# Supplementary material for: Distinct terpene metabolite blends serve as core drivers of consumer aroma preferences in fir Christmas tree species
Source: Research Square preprint supplement (doi:10.21203/rs.3.rs-5760578/v1), 2025-04-21
Supplement: Supplementary file 1 [file 075e7e37074a99237b3bcdf9.xlsx]

## Sheet: Sheet1
Table S2. Repeated measures ANOVA for each monoterpene and sesquiterpene normalized abundance over time.
Peaka	dfb	Sum Sqc	Mean Sqd	F valuee	Pr(>F)f	Significanceg
Stem Tissue
1	4	2.34674	0.586685	0.848163	0.499512
1	70	48.4199	0.691713	NA	NA
2	4	272.748	68.1871	0.876272	0.482688
2	70	5447.05	77.815	NA	NA
3	4	2.03136	0.50784	0.343939	0.847368
3	70	103.358	1.47654	NA	NA
4	4	259.405	64.8512	0.553361	0.697199
4	70	8203.66	117.195	NA	NA
5	4	1.12164	0.28041	0.403472	0.805525
5	70	48.6495	0.694992	NA	NA
6	4	1.02e-27	2.54e-28	1	0.413526
6	70	1.78e-26	2.54e-28	NA	NA
7	4	1.02e-27	2.54e-28	1	0.413526
7	70	1.78e-26	2.54e-28	NA	NA
8	4	31.7135	7.92838	0.194581	0.940448
8	70	2852.21	40.7458	NA	NA
9	4	80.3414	20.0853	0.177925	0.949073
9	70	7902.07	112.887	NA	NA
10	4	20.2108	5.0527	0.0494052	0.995315
10	70	7158.94	102.271	NA	NA
11	4	1.02e-27	2.54e-28	1	0.413526
11	70	1.78e-26	2.54e-28	NA	NA
12	4	1.75653	0.439133	0.70643	0.590221
12	70	43.5136	0.621623	NA	NA
13	4	27.6153	6.90382	0.75005	0.56131
13	70	644.314	9.20448	NA	NA
14	4	568.807	142.202	1.67816	0.164776
14	70	5931.55	84.7365	NA	NA
15	4	79.2837	19.8209	2.15369	0.0832184
15	70	644.228	9.20325	NA	NA
16	4	90.2452	22.5613	0.398723	0.808914
16	70	3960.87	56.5839	NA	NA
17	4	0.356349	0.0890874	0.00118716	0.999997
17	70	5252.95	75.0421	NA	NA
18	4	372.995	93.2489	1.18232	0.326163
18	70	5520.87	78.8695	NA	NA
19	4	0.343449	0.0858622	0.00112307	0.999997
19	70	5351.73	76.4533	NA	NA
20	4	448.507	112.127	2.23633	0.073791
20	70	3509.71	50.1388	NA	NA
21	4	285.692	71.4231	1.98285	0.106575
21	70	2521.42	36.0204	NA	NA
22	4	3.71056	0.927639	0.0109672	0.999756
22	70	5920.83	84.5833	NA	NA
23	4	24.1864	6.0466	0.088504	0.985759
23	70	4782.4	68.3201	NA	NA
24	4	86.6243	21.6561	0.199677	0.937717
24	70	7591.88	108.455	NA	NA
25	4	168.16	42.0401	0.425351	0.789836
25	70	6918.53	98.8361	NA	NA
26	4	490.862	122.716	1.88379	0.122906
26	70	4560.01	65.143	NA	NA
27	4	602.818	150.705	2.27941	0.0693
27	70	4628.1	66.1157	NA	NA
28	4	40.8778	10.2194	0.0962872	0.983324
28	70	7429.45	106.135	NA	NA
29	4	1.02e-27	2.54e-28	1	0.413526
29	70	1.78e-26	2.54e-28	NA	NA
30	4	40.4826	10.1207	0.141227	0.966272
30	70	5016.35	71.6621	NA	NA
31	4	1.02e-27	2.54e-28	1	0.413526
31	70	1.78e-26	2.54e-28	NA	NA
32	4	1.02e-27	2.54e-28	1	0.413526
32	70	1.78e-26	2.54e-28	NA	NA
33	4	12.9916	3.2479	0.0352073	0.997573
33	70	6457.55	92.2508	NA	NA
34	4	433.434	108.359	2.00492	0.103233
34	70	3783.24	54.0462	NA	NA
35	4	1.02e-27	2.54e-28	1	0.413526
35	70	1.78e-26	2.54e-28	NA	NA
36	4	1.02e-27	2.54e-28	1	0.413526
36	70	1.78e-26	2.54e-28	NA	NA
37	4	1.02e-27	2.54e-28	1	0.413526
37	70	1.78e-26	2.54e-28	NA	NA
38	4	323.907	80.9766	1.39687	0.244032
38	70	4057.91	57.9702	NA	NA
39	4	19.7585	4.93962	0.0792562	0.988433
39	70	4362.73	62.3247	NA	NA
40	4	28.0238	7.00595	0.750448	0.561051
40	70	653.498	9.33569	NA	NA
41	4	63.895	15.9737	0.356763	0.838491
41	70	3134.19	44.7741	NA	NA
42	4	54.9451	13.7363	0.335456	0.85319
42	70	2866.37	40.9481	NA	NA
43	4	1.02e-27	2.54e-28	1	0.413526
43	70	1.78e-26	2.54e-28	NA	NA
44	4	219.579	54.8948	3.49994	0.0115698	*
44	70	1097.91	15.6845	NA	NA
45	4	210.077	52.5194	0.875186	0.483331
45	70	4200.66	60.0094	NA	NA
46	4	0.223473	0.0558683	0.00054351	0.999999
46	70	7195.44	102.792	NA	NA
47	4	1.02e-27	2.54e-28	1	0.413526
47	70	1.78e-26	2.54e-28	NA	NA
48	4	1.02e-27	2.54e-28	1	0.413526
48	70	1.78e-26	2.54e-28	NA	NA
49	4	18.1576	4.5394	0.0521169	0.994806
49	70	6097.03	87.1004	NA	NA
50	4	1.02e-27	2.54e-28	1	0.413526
50	70	1.78e-26	2.54e-28	NA	NA
51	4	144.834	36.2085	0.601779	0.662604
51	70	4211.84	60.1691	NA	NA
52	4	137.005	34.2512	0.332502	0.855206
52	70	7210.75	103.011	NA	NA
53	4	79.4895	19.8724	0.412379	0.799153
53	70	3373.27	48.1896	NA	NA
54	4	79.8411	19.9603	0.206673	0.933902
54	70	6760.51	96.5787	NA	NA
55	4	32.9237	8.23092	0.146731	0.963865
55	70	3926.67	56.0954	NA	NA
56	4	0.096962	0.0242405	0.00028122	1
56	70	6033.93	86.199	NA	NA
57	4	297.085	74.2714	1.85262	0.128524
57	70	2806.3	40.0899	NA	NA
58	4	52.5471	13.1368	0.110494	0.978466
58	70	8322.4	118.891	NA	NA
59	4	1.02e-27	2.54e-28	1	0.413526
59	70	1.78e-26	2.54e-28	NA	NA
60	4	0.143667	0.0359169	0.00047541	1
60	70	5288.49	75.5499	NA	NA
61	4	482.407	120.602	1.58148	0.188827
61	70	5338.11	76.2588	NA	NA
62	4	204.619	51.1548	0.876039	0.482826
62	70	4087.53	58.3933	NA	NA
63	4	21.0717	5.26792	1	0.413526
63	70	368.754	5.26792	NA	NA
64	4	22.647	5.66175	0.0993629	0.982317
64	70	3988.63	56.9805	NA	NA
65	4	23.5724	5.89309	1	0.413526
65	70	412.517	5.89309	NA	NA
66	4	0.10312	0.0257799	0.00027268	1
66	70	6617.95	94.5422	NA	NA
67	4	2.38232	0.595581	1.21428	0.312574
67	70	34.3338	0.490483	NA	NA
68	4	90.1693	22.5423	0.461626	0.763622
68	70	3418.27	48.8324	NA	NA
69	4	0.12032	0.03008	0.00042224	1
69	70	4986.76	71.2395	NA	NA
70	4	645.182	161.296	1.58038	0.189119
70	70	7144.28	102.061	NA	NA
71	4	21.6622	5.41556	0.0830015	0.987379
71	70	4567.26	65.2465	NA	NA
72	4	0.10708	0.0267701	0.00034161	1
72	70	5485.57	78.3654	NA	NA
73	4	0.111332	0.027833	0.00034146	1
73	70	5705.8	81.5115	NA	NA
74	4	1.74874	0.437185	0.00541028	0.99994
74	70	5656.44	80.8063	NA	NA
75	4	0.13695	0.0342375	0.00048403	1
75	70	4951.38	70.734	NA	NA
76	4	29.9547	7.48866	0.0635202	0.992406
76	70	8252.59	117.894	NA	NA
77	4	0.237691	0.0594227	0.00084647	0.999999
77	70	4914.06	70.2008	NA	NA
78	4	26.3496	6.5874	0.0841669	0.987043
78	70	5478.61	78.2658	NA	NA
79	4	323.991	80.9976	0.757109	0.556711
79	70	7488.8	106.983	NA	NA
80	4	23.2903	5.82258	1	0.413526
80	70	407.581	5.82258	NA	NA
81	4	0.13374	0.0334351	0.0004109	1
81	70	5695.94	81.3706	NA	NA
82	4	16.9508	4.23771	0.0409078	0.99675
82	70	7251.43	103.592	NA	NA
83	4	325.406	81.3515	2.62555	0.0417548	*
83	70	2168.92	30.9845	NA	NA
84	4	1.02e-27	2.54e-28	1	0.413526
84	70	1.78e-26	2.54e-28	NA	NA
85	4	27.7088	6.92721	0.0637537	0.992352
85	70	7605.9	108.656	NA	NA
86	4	141.367	35.3418	1.6176	0.179482
86	70	1529.38	21.8483	NA	NA
87	4	242.351	60.5878	2.36952	0.0607565
87	70	1789.88	25.5697	NA	NA
88	4	239.922	59.9805	0.883272	0.478562
88	70	4753.51	67.9072	NA	NA
89	4	38.5027	9.62567	0.10005	0.982089
89	70	6734.58	96.2083	NA	NA
90	4	56.9059	14.2265	0.148261	0.963184
90	70	6716.88	95.9555	NA	NA
91	4	201.565	50.3914	0.606837	0.659022
91	70	5812.75	83.0393	NA	NA
92	4	25.4439	6.36097	0.0891521	0.985563
92	70	4994.47	71.3496	NA	NA
93	4	30.3462	7.58655	0.141251	0.966262
93	70	3759.68	53.7097	NA	NA
94	4	19.7688	4.94221	0.0466531	0.995806
94	70	7415.48	105.935	NA	NA
95	4	107.944	26.986	0.561036	0.691682
95	70	3367.02	48.1003	NA	NA
96	4	28.304	7.076	0.0682899	0.991281
96	70	7253.19	103.617	NA	NA
97	4	76.6963	19.1741	0.288744	0.88435
97	70	4648.35	66.405	NA	NA
98	4	1.02e-27	2.54e-28	1	0.413526
98	70	1.78e-26	2.54e-28	NA	NA
99	4	72.787	18.1968	0.614618	0.653528
99	70	2072.46	29.6066	NA	NA
100	4	1.02e-27	2.54e-28	1	0.413526
100	70	1.78e-26	2.54e-28	NA	NA
101	4	35.2044	8.80109	0.0859338	0.986526
101	70	7169.2	102.417	NA	NA
102	4	31.6014	7.90034	0.0991027	0.982403
102	70	5580.31	79.7187	NA	NA
103	4	145.482	36.3705	0.516347	0.723932
103	70	4930.66	70.4381	NA	NA
104	4	67.1892	16.7973	0.202518	0.936177
104	70	5805.97	82.9424	NA	NA
105	4	157.159	39.2897	0.355479	0.839384
105	70	7736.84	110.526	NA	NA
106	4	189.141	47.2853	0.506759	0.730881
106	70	6531.65	93.3093	NA	NA
107	4	1.53621	0.384053	0.00318711	0.999979
107	70	8435.13	120.502	NA	NA
108	4	78.8331	19.7083	0.362055	0.834803
108	70	3810.41	54.4344	NA	NA
109	4	75.2489	18.8122	0.285077	0.886722
109	70	4619.29	65.9899	NA	NA
110	4	1.02e-27	2.54e-28	1	0.413526
110	70	1.78e-26	2.54e-28	NA	NA
111	4	230.125	57.5313	0.470689	0.757051
111	70	8555.96	122.228	NA	NA
112	4	1.02e-27	2.54e-28	1	0.413526
112	70	1.78e-26	2.54e-28	NA	NA
113	4	1.02e-27	2.54e-28	1	0.413526
113	70	1.78e-26	2.54e-28	NA	NA
114	4	251.541	62.8852	0.541315	0.705879
114	70	8131.99	116.171	NA	NA
115	4	93.2856	23.3214	0.383809	0.819507
115	70	4253.42	60.7631	NA	NA
116	4	24.2434	6.06086	0.0844373	0.986965
116	70	5024.55	71.7793	NA	NA
117	4	383.3	95.8251	1.42279	0.235477
117	70	4714.49	67.3499	NA	NA
118	4	243.363	60.8407	1.12475	0.351912
118	70	3786.47	54.0924	NA	NA
119	4	315.577	78.8943	2.625	0.0417887	*
119	70	2103.85	30.055	NA	NA
120	4	311.209	77.8023	0.814577	0.520139
120	70	6685.88	95.5126	NA	NA
121	4	76.5391	19.1348	0.430071	0.786436
121	70	3114.44	44.4921	NA	NA
122	4	0.112857	0.0282142	0.00029668	1
122	70	6656.94	95.0992	NA	NA
123	4	34.232	8.558	0.0765278	0.989174
123	70	7828.01	111.829	NA	NA
124	4	1.02e-27	2.54e-28	1	0.413526
124	70	1.78e-26	2.54e-28	NA	NA
125	4	2297.04	574.261	7.72445	3.25e-05	*
125	70	5204.02	74.3432	NA	NA
126	4	295.729	73.9322	0.695562	0.59755
126	70	7440.38	106.291	NA	NA
127	4	252.072	63.018	0.790479	0.535282
127	70	5580.49	79.7213	NA	NA
128	4	0.972799	0.2432	0.00324251	0.999978
128	70	5250.24	75.0034	NA	NA
129	4	1.02e-27	2.54e-28	1	0.413526
129	70	1.78e-26	2.54e-28	NA	NA
130	4	19.9341	4.98351	1	0.413526
130	70	348.846	4.98351	NA	NA
131	4	105.348	26.3371	0.462572	0.762937
131	70	3985.54	56.9363	NA	NA
132	4	162.625	40.6564	1.06018	0.382794
132	70	2684.39	38.3485	NA	NA
Needle Tissue
1	4	0.625127	0.156282	0.30375	0.874523
1	70	36.0156	0.514508	NA	NA
2	4	0.297902	0.0744755	0.000462629	1
2	70	11268.8	160.983	NA	NA
3	4	0.0416474	0.0104119	0.00448118	0.999959
3	70	162.642	2.32346	NA	NA
4	4	258.882	64.7205	0.429948	0.786525
4	70	10537.2	150.531	NA	NA
5	4	0.546338	0.136584	0.176256	0.949911
5	70	54.2445	0.774922	NA	NA
6	4	60.0555	15.0139	0.161268	0.957205
6	70	6516.92	93.0989	NA	NA
7	4	26.0648	6.51621	0.10617	0.98
7	70	4296.26	61.3751	NA	NA
8	4	1.01757e-27	2.54393e-28	1	0.413526
8	70	1.78075e-26	2.54393e-28	NA	NA
9	4	91.9526	22.9881	0.2107	0.931672
9	70	7637.26	109.104	NA	NA
10	4	374.1	93.525	0.966181	0.431631
10	70	6775.9	96.7986	NA	NA
11	4	31.0971	7.77427	0.136665	0.968219
11	70	3982	56.8858	NA	NA
12	4	0.584486	0.146122	1.20299	0.317316
12	70	8.50257	0.121465	NA	NA
13	4	28.7278	7.18194	0.75004	0.561317
13	70	670.279	9.57541	NA	NA
14	4	159.062	39.7654	0.363271	0.833954
14	70	7662.55	109.465	NA	NA
15	4	1.01757e-27	2.54393e-28	1	0.413526
15	70	1.78075e-26	2.54393e-28	NA	NA
16	4	63.537	15.8843	0.908607	0.463839
16	70	1223.74	17.482	NA	NA
17	4	0.115166	0.0287915	0.000329057	1
17	70	6124.78	87.4969	NA	NA
18	4	148.925	37.2313	0.441711	0.778036
18	70	5900.22	84.2888	NA	NA
19	4	249.607	62.4018	0.574969	0.681695
19	70	7597.16	108.531	NA	NA
20	4	195.901	48.9753	1.09914	0.363907
20	70	3119.06	44.5579	NA	NA
21	4	236.876	59.219	1.87114	0.125156
21	70	2215.4	31.6485	NA	NA
22	4	101.948	25.4871	0.204656	0.93501
22	70	8717.53	124.536	NA	NA
23	4	319.335	79.8338	0.88966	0.474818
23	70	6281.46	89.7351	NA	NA
24	4	297.569	74.3923	0.894045	0.47226
24	70	5824.6	83.2086	NA	NA
25	4	146.919	36.7298	0.406286	0.803514
25	70	6328.27	90.4038	NA	NA
26	4	94.3416	23.5854	1.40787	0.240367
26	70	1172.68	16.7525	NA	NA
27	4	70.0845	17.5211	0.545989	0.702508
27	70	2246.34	32.0906	NA	NA
28	4	0.402805	0.100701	0.000798061	0.999999
28	70	8832.77	126.182	NA	NA
29	4	161.933	40.4831	0.905163	0.465821
29	70	3130.73	44.7247	NA	NA
30	4	216.638	54.1594	0.580378	0.677829
30	70	6532.23	93.3175	NA	NA
31	4	80.7653	20.1913	0.609052	0.657457
31	70	2320.64	33.1521	NA	NA
32	4	67.7588	16.9397	0.356373	0.838763
32	70	3327.36	47.5337	NA	NA
33	4	101.472	25.3681	0.272831	0.894551
33	70	6508.68	92.9811	NA	NA
34	4	69.3792	17.3448	0.160051	0.957779
34	70	7585.94	108.371	NA	NA
35	4	67.8214	16.9553	0.343294	0.847812
35	70	3457.31	49.3901	NA	NA
36	4	0.182072	0.0455181	0.000606942	0.999999
36	70	5249.7	74.9957	NA	NA
37	4	85.914	21.4785	0.557339	0.694338
37	70	2697.63	38.5376	NA	NA
38	4	0.251267	0.0628167	0.0188333	0.999289
38	70	233.479	3.33541	NA	NA
39	4	24.9442	6.23605	0.0915215	0.984835
39	70	4769.63	68.1375	NA	NA
40	4	67.9115	16.9779	0.345234	0.846476
40	70	3442.45	49.1778	NA	NA
41	4	29.4435	7.36088	0.0707804	0.990665
41	70	7279.72	103.996	NA	NA
42	4	74.6337	18.6584	0.541092	0.706039
42	70	2413.8	34.4829	NA	NA
43	4	0.0882744	0.0220686	0.000350262	1
43	70	4410.43	63.0061	NA	NA
44	4	1.01757e-27	2.54393e-28	1	0.413526
44	70	1.78075e-26	2.54393e-28	NA	NA
45	4	0.0774262	0.0193566	0.00020419	1
45	70	6635.79	94.797	NA	NA
46	4	19.4415	4.86038	0.0469518	0.995754
46	70	7246.28	103.518	NA	NA
47	4	0.0152027	0.00380068	5.19352e-05	1
47	70	5122.68	73.1812	NA	NA
48	4	31.0207	7.75517	0.0824686	0.987531
48	70	6582.64	94.0378	NA	NA
49	4	113.331	28.3327	0.262039	0.901325
49	70	7568.67	108.124	NA	NA
50	4	50.7036	12.6759	0.218593	0.927233
50	70	4059.2	57.9886	NA	NA
51	4	32.1396	8.03489	0.0944362	0.983918
51	70	5955.79	85.0827	NA	NA
52	4	0.910121	0.22753	0.00204179	0.999991
52	70	7800.56	111.437	NA	NA
53	4	218.943	54.7358	0.51357	0.725944
53	70	7460.53	106.579	NA	NA
54	4	278.36	69.59	0.677138	0.610083
54	70	7193.96	102.771	NA	NA
55	4	1.01757e-27	2.54393e-28	1	0.413526
55	70	1.78075e-26	2.54393e-28	NA	NA
56	4	360.785	90.1963	0.784466	0.539105
56	70	8048.46	114.978	NA	NA
57	4	0.228492	0.057123	0.000649059	0.999999
57	70	6160.62	88.0089	NA	NA
58	4	0.209383	0.0523457	0.000407744	1
58	70	8986.52	128.379	NA	NA
59	4	180.262	45.0655	0.637727	0.637316
59	70	4946.6	70.6657	NA	NA
60	4	84.6447	21.1612	0.2406	0.914402
60	70	6156.62	87.9518	NA	NA
61	4	189.964	47.491	0.543572	0.704251
61	70	6115.78	87.3684	NA	NA
62	4	80.5725	20.1431	2.15385	0.0831992
62	70	654.652	9.35217	NA	NA
63	4	65.9768	16.4942	0.175347	0.950365
63	70	6584.62	94.066	NA	NA
64	4	28.8118	7.20295	0.127361	0.972045
64	70	3958.88	56.5555	NA	NA
65	4	0.105621	0.0264052	0.000341398	1
65	70	5414.12	77.3445	NA	NA
66	4	106.707	26.6769	0.233442	0.918645
66	70	7999.33	114.276	NA	NA
67	4	0.839267	0.209817	0.346322	0.845725
67	70	42.409	0.605843	NA	NA
68	4	1.01757e-27	2.54393e-28	1	0.413526
68	70	1.78075e-26	2.54393e-28	NA	NA
69	4	20.5788	5.14471	0.0478068	0.995603
69	70	7533.02	107.615	NA	NA
70	4	30.0555	7.51387	0.0699897	0.990863
70	70	7514.97	107.357	NA	NA
71	4	98.2341	24.5585	0.379369	0.822645
71	70	4531.47	64.7352	NA	NA
72	4	27.1766	6.79415	0.0873684	0.9861
72	70	5443.51	77.7645	NA	NA
73	4	0.0674929	0.0168732	0.000200934	1
73	70	5878.18	83.9739	NA	NA
74	4	0.533364	0.133341	0.00150072	0.999995
74	70	6219.58	88.8511	NA	NA
75	4	24.2636	6.06589	0.0881567	0.985864
75	70	4816.56	68.8081	NA	NA
76	4	111.612	27.9029	0.24207	0.913523
76	70	8068.75	115.268	NA	NA
77	4	84.1459	21.0365	0.328247	0.858101
77	70	4486.11	64.0872	NA	NA
78	4	0.168226	0.0420566	0.000501413	0.999999
78	70	5871.33	83.8761	NA	NA
79	4	293.293	73.3233	1.12865	0.350117
79	70	4547.59	64.9655	NA	NA
80	4	701.632	175.408	3.86869	0.00675458	*
80	70	3173.83	45.3404	NA	NA
81	4	0.0305407	0.00763516	7.98343e-05	1
81	70	6694.63	95.6376	NA	NA
82	4	0.0879052	0.0219763	0.000247821	1
82	70	6207.48	88.6783	NA	NA
83	4	445.313	111.328	1.47187	0.220027
83	70	5294.6	75.6371	NA	NA
84	4	288.966	72.2415	1.74997	0.148812
84	70	2889.71	41.2815	NA	NA
85	4	0.462111	0.115528	0.000883103	0.999998
85	70	9157.43	130.82	NA	NA
86	4	0.0955487	0.0238872	0.000248531	1
86	70	6727.95	96.1136	NA	NA
87	4	102.352	25.588	0.350411	0.842899
87	70	5111.6	73.0229	NA	NA
88	4	103.665	25.9162	0.901956	0.467671
88	70	2011.33	28.7333	NA	NA
89	4	0.043865	0.0109662	0.000118034	1
89	70	6503.55	92.9079	NA	NA
90	4	0.0636627	0.0159157	0.000182729	1
90	70	6096.99	87.0999	NA	NA
91	4	0.0515802	0.012895	0.000146872	1
91	70	6145.87	87.7981	NA	NA
92	4	0.0331142	0.00827855	9.08004e-05	1
92	70	6382.11	91.1731	NA	NA
93	4	99.3865	24.8466	1.39855	0.24347
93	70	1243.62	17.766	NA	NA
94	4	131.286	32.8215	0.244106	0.9123
94	70	9411.92	134.456	NA	NA
95	4	21.0032	5.2508	0.0844057	0.986974
95	70	4354.64	62.2091	NA	NA
96	4	206.003	51.5008	0.576711	0.680449
96	70	6251.06	89.3009	NA	NA
97	4	37.8491	9.46228	0.135832	0.968569
97	70	4876.32	69.6617	NA	NA
98	4	0.0383945	0.00959862	0.000142968	1
98	70	4699.69	67.1384	NA	NA
99	4	33.6576	8.4144	0.503228	0.733442
99	70	1170.46	16.7209	NA	NA
100	4	0.0651878	0.016297	0.000197678	1
100	70	5770.94	82.4421	NA	NA
101	4	25.1936	6.29841	0.0668734	0.991622
101	70	6592.89	94.1841	NA	NA
102	4	19.286	4.82151	0.0516681	0.994892
102	70	6532.18	93.3169	NA	NA
103	4	0.143852	0.035963	0.000542258	0.999999
103	70	4642.46	66.3208	NA	NA
104	4	82.7415	20.6854	0.278775	0.890769
104	70	5194.07	74.201	NA	NA
105	4	228	57.0001	0.483781	0.747552
105	70	8247.55	117.822	NA	NA
106	4	520.882	130.22	1.33318	0.266249
106	70	6837.38	97.6769	NA	NA
107	4	191.022	47.7555	0.394962	0.811592
107	70	8463.82	120.912	NA	NA
108	4	0.226883	0.0567207	0.000803044	0.999999
108	70	4944.24	70.6321	NA	NA
109	4	19.6646	4.91616	0.0819261	0.987686
109	70	4200.51	60.0072	NA	NA
110	4	0.11738	0.029345	0.000366115	1
110	70	5610.68	80.1525	NA	NA
111	4	276.775	69.1938	0.568607	0.68625
111	70	8518.3	121.69	NA	NA
112	4	18.9234	4.73084	0.0846287	0.986909
112	70	3913.08	55.9011	NA	NA
113	4	0.0908848	0.0227212	0.00027509	1
113	70	5781.69	82.5956	NA	NA
114	4	0.730099	0.182525	0.00141262	0.999996
114	70	9044.68	129.21	NA	NA
115	4	1.01757e-27	2.54393e-28	1	0.413526
115	70	1.78075e-26	2.54393e-28	NA	NA
116	4	40.8913	10.2228	0.0862649	0.986429
116	70	8295.35	118.505	NA	NA
117	4	27.3426	6.83566	0.081264	0.987873
117	70	5888.17	84.1166	NA	NA
118	4	85.4022	21.3506	0.277684	0.891465
118	70	5382.16	76.888	NA	NA
119	4	1.01757e-27	2.54393e-28	1	0.413526
119	70	1.78075e-26	2.54393e-28	NA	NA
120	4	395.584	98.896	0.862368	0.490959
120	70	8027.57	114.68	NA	NA
121	4	24.7272	6.18181	0.0861094	0.986475
121	70	5025.31	71.7902	NA	NA
122	4	0.0289619	0.00724047	6.57545e-05	1
122	70	7707.96	110.114	NA	NA
123	4	36.8482	9.21206	0.0827683	0.987446
123	70	7790.95	111.299	NA	NA
124	4	24.9549	6.23873	0.0907238	0.985082
124	70	4813.63	68.7662	NA	NA
125	4	1.01757e-27	2.54393e-28	1	0.413526
125	70	1.78075e-26	2.54393e-28	NA	NA
126	4	72.8908	18.2227	0.793018	0.533673
126	70	1608.53	22.9789	NA	NA
127	4	93.1678	23.292	0.38215	0.820681
127	70	4266.49	60.9498	NA	NA
128	4	1.01757e-27	2.54393e-28	1	0.413526
128	70	1.78075e-26	2.54393e-28	NA	NA
129	4	167.606	41.9015	1.08353	0.371382
129	70	2707	38.6714	NA	NA
130	4	115.737	28.9343	0.563431	0.689962
130	70	3594.76	51.3538	NA	NA
131	4	614.928	153.732	1.50978	0.208736
131	70	7127.69	101.824	NA	NA
132	4	1.01757e-27	2.54393e-28	1	0.413526
132	70	1.78075e-26	2.54393e-28	NA	NA
a Peak number assigned to peaks identified from GC-MS
b Degrees of Freedom
c Sum Square
d Mean Square
e F value
f Pr(>F)
g Significance
