# Supplementary material for: Distinct terpene metabolite blends serve as core drivers of consumer aroma preferences in fir Christmas tree species
Source: Research Square preprint supplement (doi:10.21203/rs.3.rs-5760578/v1), 2025-04-21
Supplement: Supplementary file 2 [file 1c8d470c8f695a3609edea02.xlsx]

## Sheet: Sheet1
Table S10. Metabolite profiles of diterpenes identified in the five species with varying consumer liking ratings.
Peak # (letter indicates significant differences between species)			Letters indicate significant differences between tissue types		Letters indicate significant differences between tissue types
Peak 133*	Species	Needle		Stem
C	Fraser	0 ±0	nsd	0 ±0	nsd
C	Concolor	0 ±0	nsd	0 ±0	nsd
B	Nordmann	0 ±0	b	7.67e-07 ±4.16e-07	a
A	Trojan	4.36e-07 ±9.39e-08	nsd	6.82e-06 ±1.99e-06	nsd
C	Noble	0 ±0	nsd	0 ±0	nsd
Peak 134*	Species	Needle		Stem
B	Fraser	0 ±0	b	2.25e-05 ±5.18e-06	a
C	Concolor	0 ±0	b	1.27e-05 ±3.39e-06	a
C	Nordmann	0 ±0	b	1.27e-06 ±6.24e-07	a
A	Trojan	6.01e-07 ±9.08e-08	nsd	4.38e-06 ±9.88e-07	nsd
D	Noble	0 ±0	nsd	0 ±0	nsd
Peak 135*	Species	Needle		Stem
A	Fraser	0 ±0	b	2.8e-06 ±9.18e-07	a
B	Concolor	0 ±0	nsd	0 ±0	nsd
B	Nordmann	0 ±0	nsd	0 ±0	nsd
B	Trojan	0 ±0	nsd	0 ±0	nsd
B	Noble	0 ±0	nsd	0 ±0	nsd
Peak 136*	Species	Needle		Stem
C	Fraser	0 ±0	nsd	0 ±0	nsd
A	Concolor	0 ±0	b	1.43e-06 ±3.79e-07	a
B	Nordmann	0 ±0	b	7.42e-07 ±5.58e-07	a
C	Trojan	0 ±0	nsd	0 ±0	nsd
C	Noble	0 ±0	nsd	0 ±0	nsd
Peak 137*	Species	Needle		Stem
B	Fraser	0 ±0	b	7.5e-06 ±1.96e-06	a
D	Concolor	0 ±0	nsd	0 ±0	nsd
C	Nordmann	0 ±0	b	1.24e-06 ±7.18e-07	a
A	Trojan	1.11e-06 ±1.61e-07	b	1.33e-05 ±1.88e-06	a
D	Noble	0 ±0	nsd	0 ±0	nsd
Peak 138*	Species	Needle		Stem
B	Fraser	0 ±0	b	8.51e-06 ±2.43e-06	a
D	Concolor	0 ±0	b	5.5e-08 ±3.05e-08	a
C	Nordmann	0 ±0	b	2.16e-06 ±7.57e-07	a
A	Trojan	1.4e-06 ±7.48e-08	nsd	9.43e-06 ±1.12e-06	nsd
D	Noble	0 ±0	b	5.26e-08 ±2.88e-08	a
Peak 139*	Species	Needle		Stem
B	Fraser	0 ±0	nsd	0 ±0	nsd
A	Concolor	0 ±0	b	3.77e-07 ±1.5e-07	a
B	Nordmann	0 ±0	nsd	0 ±0	nsd
B	Trojan	0 ±0	nsd	0 ±0	nsd
B	Noble	0 ±0	nsd	0 ±0	nsd
Peak 140*	Species	Needle		Stem
B	Fraser	0 ±0	nsd	0 ±0	nsd
B	Concolor	0 ±0	nsd	0 ±0	nsd
B	Nordmann	0 ±0	nsd	0 ±0	nsd
B	Trojan	0 ±0	nsd	0 ±0	nsd
A	Noble	0 ±0	b	4.05e-07 ±9.91e-08	a
Peak 141*	Species	Needle		Stem
A	Fraser	5.29e-06 ±8.28e-07	nsd	3.43e-05 ±7.26e-06	nsd
C	Concolor	0 ±0	b	3.3e-07 ±1.79e-07	a
C	Nordmann	0 ±0	nsd	0 ±0	nsd
C	Trojan	0 ±0	nsd	0 ±0	nsd
B	Noble	1.35e-06 ±2.73e-07	b	3.63e-06 ±6.5e-07	a
Peak 142*	Species	Needle		Stem
B	Fraser	0 ±0	b	1.84e-05 ±4.5e-06	a
C	Concolor	0 ±0	nsd	0 ±0	nsd
B	Nordmann	0 ±0	b	1.61e-05 ±4.8e-06	a
A	Trojan	4.68e-06 ±6.61e-07	b	2.95e-05 ±4.05e-06	a
C	Noble	0 ±0	nsd	0 ±0	nsd
Peak 144*	Species	Needle		Stem
C	Fraser	0 ±0	nsd	0 ±0	nsd
C	Concolor	0 ±0	b	7.76e-08 ±4.34e-08	a
B	Nordmann	0 ±0	b	6.98e-07 ±3.45e-07	a
A	Trojan	1.15e-06 ±6.81e-08	nsd	2.75e-06 ±5.74e-07	nsd
C	Noble	0 ±0	nsd	0 ±0	nsd
Peak 145*	Species	Needle		Stem
A	Fraser	0 ±0	b	5.3e-06 ±1.4e-06	a
B	Concolor	0 ±0	nsd	1.87e-07 ±1.3e-07	nsd
B	Nordmann	0 ±0	nsd	3.92e-08 ±3.92e-08	nsd
B	Trojan	0 ±0	nsd	0 ±0	nsd
B	Noble	0 ±0	nsd	0 ±0	nsd
Peak 146*	Species	Needle		Stem
A	Fraser	0 ±0	b	7.97e-06 ±2.45e-06	a
B	Concolor	0 ±0	nsd	0 ±0	nsd
B	Nordmann	0 ±0	nsd	0 ±0	nsd
B	Trojan	0 ±0	nsd	0 ±0	nsd
B	Noble	0 ±0	nsd	0 ±0	nsd
Peak 147*	Species	Needle		Stem
AB	Fraser	3.47e-08 ±2.43e-08	nsd	5.85e-07 ±4.51e-07	nsd
AB	Concolor	0 ±0	b	1.03e-07 ±3.67e-08	a
B	Nordmann	0 ±0	b	5.65e-08 ±3.83e-08	a
A	Trojan	2.9e-07 ±7.48e-08	a	0 ±0	b
B	Noble	0 ±0	nsd	0 ±0	nsd
Peak 148*	Species	Needle		Stem
B	Fraser	0 ±0	nsd	0 ±0	nsd
A	Concolor	0 ±0	b	3.39e-07 ±1.35e-07	a
B	Nordmann	0 ±0	nsd	0 ±0	nsd
B	Trojan	0 ±0	nsd	0 ±0	nsd
B	Noble	0 ±0	nsd	0 ±0	nsd
Peak 149*	Species	Needle		Stem
B	Fraser	0 ±0	b	3.89e-05 ±7.3e-06	a
D	Concolor	0 ±0	nsd	0 ±0	nsd
C	Nordmann	0 ±0	b	9.12e-06 ±2.9e-06	a
A	Trojan	3.3e-06 ±4.88e-07	b	2.63e-05 ±3.87e-06	a
D	Noble	3.63e-07 ±1.95e-07	a	0 ±0	b
Peak 150*	Species	Needle		Stem
A	Fraser	8.44e-07 ±9e-08	b	3.2e-05 ±6.59e-06	a
BC	Concolor	0 ±0	b	2.23e-07 ±1.2e-07	a
C	Nordmann	0 ±0	nsd	0 ±0	nsd
C	Trojan	0 ±0	nsd	0 ±0	nsd
B	Noble	0 ±0	b	5.17e-07 ±1.96e-07	a
Peak 151*	Species	Needle		Stem
B	Fraser	0 ±0	nsd	0 ±0	nsd
B	Concolor	0 ±0	nsd	0 ±0	nsd
A	Nordmann	8.76e-07 ±2.27e-07	a	0 ±0	b
B	Trojan	1.81e-06 ±1.28e-06	a	0 ±0	b
B	Noble	0 ±0	nsd	0 ±0	nsd
Peak 152*	Species	Needle		Stem
B	Fraser	0 ±0	b	3.44e-05 ±6.53e-06	a
D	Concolor	0 ±0	nsd	0 ±0	nsd
C	Nordmann	0 ±0	b	1.59e-05 ±4.98e-06	a
A	Trojan	6.01e-06 ±1.76e-06	b	3.05e-05 ±4.02e-06	a
D	Noble	0 ±0	ns	0 ±0	nsd
Peak 153*	Species	Needle		Stem
A	Fraser	0 ±0	b	4.76e-07 ±2.2e-07	a
B	Concolor	0 ±0	nsd	0 ±0	nsd
B	Nordmann	0 ±0	nsd	0 ±0	nsd
AB	Trojan	0 ±0	b	1.33e-06 ±7.66e-07	a
AB	Noble	0 ±0	b	2.51e-07 ±1.34e-07	a
Peak 154*	Species	Needle		Stem
B	Fraser	0 ±0	nsd	0 ±0	nsd
A	Concolor	0 ±0	b	2.26e-07 ±1.03e-07	a
B	Nordmann	0 ±0	nsd	0 ±0	nsd
B	Trojan	0 ±0	nsd	0 ±0	nsd
B	Noble	0 ±0	nsd	0 ±0	nsd
Peak 155*	Species	Needle		Stem
C	Fraser	0 ±0	nsd	0 ±0	nsd
B	Concolor	5.1e-05 ±3.59e-06	a	0 ±0	b
C	Nordmann	0 ±0	nsd	0 ±0	nsd
C	Trojan	0 ±0	nsd	0 ±0	nsd
A	Noble	2.33e-05 ±1.44e-06	a	0 ±0	b
Peak 156*	Species	Needle		Stem
AB	Fraser	5.97e-05 ±5.76e-06	b	1.59e-3 ±3.3e-4	a
B	Concolor	0 ±0	b	2.38e-4 ±4.71e-05	a
B	Nordmann	5.27e-05 ±5.12e-06	nsd	5.66e-4 ±1.67e-4	nsd
A	Trojan	3.31e-4 ±1.25e-05	nsd	1.08e-3 ±1.33e-4	nsd
C	Noble	0 ±0	b	2.43e-05 ±5.33e-06	a
Peak 157*	Species	Needle		Stem
B	Fraser	0 ±0	nsd	9.55e-07 ±6.83e-07	nsd
B	Concolor	0 ±0	nsd	0 ±0	nsd
A	Nordmann	0 ±0	b	3.04e-06 ±1.03e-06	a
AB	Trojan	0 ±0	b	5.77e-06 ±2.09e-06	a
B	Noble	0 ±0	b	5.54e-07 ±2.95e-07	a
Peak 158	Species	Needle		Stem
C	Fraser	0±0	b	1.8e-04±2.84e-05	a
B	Concolor	7.27e-06±3.98e-07	b	6.06e-05±1.47e-05	a
A	Nordmann	8.3e-06±1.1e-06	nsd	3.55e-05±1.17e-05	nsd
A	Trojan	3.03e-05±4.47e-06	b	1.03e-04±2.36e-05	a
C	Noble	7.07e-06±4.37e-07	a	0±0	b
Peak 159*	Species	Needle		Stem
B	Fraser	0±0	nsd	1.86e-07±1.32e-07	nsd
B	Concolor	0±0	nsd	0±0	a
B	Nordmann	0±0	nsd	0±0	a
B	Trojan	0±0	nsd	0±0	a
A	Noble	0±0	b	3.01e-07±1.37e-07	a
Peak 160*	Species	Needle		Stem
B	Fraser	0 ±0	nsd	0 ±0	nsd
A	Concolor	0 ±0	b	3.79e-07 ±1.09e-07	a
B	Nordmann	0 ±0	nsd	0 ±0	nsd
B	Trojan	0 ±0	nsd	0 ±0	nsd
B	Noble	0 ±0	nsd	0 ±0	nsd
Peak 162*	Species	Needle		Stem
B	Fraser	0 ±0	nsd	0 ±0	nsd
B	Concolor	0 ±0	nsd	0 ±0	nsd
B	Nordmann	0 ±0	nsd	0 ±0	nsd
A	Trojan	0 ±0	b	7.41e-07 ±4.41e-07	a
B	Noble	0 ±0	nsd	0 ±0	nsd
Peak 163*	Species	Needle		Stem
B	Fraser	0 ±0	nsd	0 ±0	nsd
A	Concolor	0 ±0	b	6.56e-07 ±1.81e-07	a
B	Nordmann	0 ±0	nsd	0 ±0	nsd
B	Trojan	0 ±0	nsd	0 ±0	nsd
B	Noble	0 ±0	nsd	0 ±0	nsd
Peak 164*	Species	Needle		Stem
C	Fraser	0 ±0	b	4.46e-05 ±9.17e-06	a
B	Concolor	2.35e-05 ±2.05e-06	b	7.4e-05 ±5.49e-06	a
AB	Nordmann	2.06e-05 ±2.14e-06	b	1.6e-4 ±4.52e-05	a
A	Trojan	8.49e-05 ±2.89e-06	nsd	1.76e-4 ±2.74e-05	nsd
D	Noble	0 ±0	nsd	0 ±0	nsd
Peak 165*	Species	Needle		Stem
B	Fraser	0 ±0	nsd	0 ±0	nsd
B	Concolor	0 ±0	nsd	0 ±0	nsd
B	Nordmann	0 ±0	nsd	6.76e-07 ±6.76e-07	nsd
A	Trojan	0 ±0	b	6.61e-06 ±3.03e-06	a
AB	Noble	0 ±0	nsd	3.94e-07 ±2.67e-07	nsd
Peak 166*	Species	Needle		Stem
B	Fraser	0 ±0	nsd	0 ±0	nsd
B	Concolor	0 ±0	nsd	0 ±0	nsd
B	Nordmann	0 ±0	nsd	5.84e-07 ±5.84e-07	nsd
A	Trojan	5.82e-06 ±1.1e-06	a	0 ±0	b
B	Noble	0 ±0	nsd	0 ±0	nsd
Peak 167	Species	Needle		Stem
NSD	Fraser	2.51e-07 ±1.11e-07	a	0 ±0	b
NSD	Concolor	0 ±0	b	8.05e-07 ±3.94e-07	a
NSD	Nordmann	1.08e-07 ±7.47e-08	a	0 ±0	b
NSD	Trojan	0 ±0	nsd	0 ±0	nsd
NSD	Noble	0 ±0	b	2.01e-07 ±1.07e-07	a
Peak 168*	Species	Needle		Stem
AB	Fraser	7.09e-07 ±2.66e-07	a	0 ±0	b
A	Concolor	0 ±0	b	5.31e-07 ±1.88e-07	a
AB	Nordmann	1.9e-07 ±1.3e-07	ns	0 ±0	nsd
B	Trojan	0 ±0	nsd	0 ±0	nsd
AB	Noble	0 ±0		2.86e-07 ±1.95e-07
Peak 169	Species	Needle		Stem
NSD	Fraser	0 ±0	nsd	0 ±0	nsd
NSD	Concolor	0 ±0	nsd	0 ±0	nsd
NSD	Nordmann	0 ±0	b	1.87e-07 ±1.87e-07	a
NSD	Trojan	0 ±0	nsd	0 ±0	nsd
NSD	Noble	0 ±0	nsd	0 ±0	nsd
Peak 170*	Species	Needle		Stem
B	Fraser	0 ±0	nsd	0 ±0	nsd
A	Concolor	0 ±0	b	7.64e-07 ±3.47e-07	a
B	Nordmann	0 ±0	nsd	0 ±0	nsd
B	Trojan	0 ±0	nsd	0 ±0	nsd
B	Noble	0 ±0	nsd	0 ±0	nsd
IS	Species	Needle		Stem
B	Fraser	1.39e-05 ±3.33e-07	nsd	1.29e-05 ±6.16e-07	nsd
A	Concolor	1.53e-05 ±6.62e-07	nsd	1.46e-05 ±6.74e-07	nsd
AB	Nordmann	1.43e-05 ±6.25e-07	nsd	1.3e-05 ±7.04e-07	nsd
AB	Trojan	1.44e-05 ±4.05e-07	nsd	1.46e-05 ±1.74e-06	nsd
AB	Noble	1.4e-05 ±6.95e-07	nsd	1.57e-05 ±9.77e-07	nsd
Peak 171	Species	Needle		Stem
NSD	Fraser	0 ±0	b	9.98e-07 ±6.82e-07	a
NSD	Concolor	0 ±0	b	6.34e-07 ±4.35e-07	a
NSD	Nordmann	0 ±0	nsd	0 ±0	nsd
NSD	Trojan	0 ±0	nsd	0 ±0	nsd
NSD	Noble	0 ±0	nsd	0 ±0	nsd
Peak 172*	Species	Needle		Stem
AB	Fraser	0 ±0	b	3.12e-06 ±2.11e-06	a
A	Concolor	0 ±0	b	1.12e-06 ±4.31e-07	a
B	Nordmann	0 ±0	nsd	0 ±0	nsd
B	Trojan	0 ±0	nsd	0 ±0	nsd
AB	Noble	0 ±0	b	3.33e-07 ±1.78e-07	a
Peak 173*	Species	Needle		Stem
AB	Fraser	0 ±0	b	6.14e-07 ±3.54e-07	a
B	Concolor	0 ±0	nsd	0 ±0	nsd
B	Nordmann	0 ±0	nsd	0 ±0	nsd
A	Trojan	0 ±0	b	7.61e-06 ±2.81e-06	a
B	Noble	0 ±0	nsd	0 ±0	nsd
