# Supplementary material for: Distinct terpene metabolite blends serve as core drivers of consumer aroma preferences in fir Christmas tree species
Source: Research Square preprint supplement (doi:10.21203/rs.3.rs-5760578/v1), 2025-04-21
Supplement: Supplementary file 3 [file 287030a6484df6ea92a47282.xlsx]

## Sheet: Sheet1
Table S4. Metabolite profiles of monoterpenes and sesquiterpenes identified in the five species with varying consumer liking.
Peak # (letter indicates significant differences between species)			Letters indicate significant differences between tissue types		Letters indicate significant differences between tissue types
Peak 4*	Species	Needle		Stem
B	Fraser	1.68e-06 ±1.32e-07	a	1.09e-06 ±4.55e-07	b
C	Concolor	0 ±0	nsd	0 ±0	nsd
A	Nordmann	2.23e-06 ±2.55e-07	nsd	1.32e-06 ±1.15e-07	nsd
C	Trojan	0 ±0	nsd	0 ±0	nsd
B	Noble	5.15e-06 ±4.97e-07	a	5.59e-07 ±3.84e-07	b
Peak 6*	Species	Needle		Stem
B	Fraser	0 ±0	nsd	0 ±0	nsd
B	Concolor	0 ±0	nsd	0 ±0	nsd
B	Nordmann	0 ±0	nsd	0 ±0	nsd
A	Trojan	6.67e-08 ±1.49e-08	a	0 ±0	b
A	Noble	1.54e-07 ±2.54e-08	a	0 ±0	b
Peak 7*	Species	Needle		Stem
A	Fraser	1.54e-07 ±2.58e-08	a	0 ±0	b
B	Concolor	0 ±0	nsd	0 ±0	nsd
B	Nordmann	0 ±0	nsd	0 ±0	nsd
B	Trojan	0 ±0	nsd	0 ±0	nsd
B	Noble	0 ±0	nsd	0 ±0	nsd
Peak 9*	Species	Needle		Stem
B	Fraser	5.74e-08 ±2.76e-08	b	6.96e-08 ±8.12e-09	a
A	Concolor	9.92e-08 ±1.61e-08	nsd	1.02e-07 ±5.1e-09	nsd
B	Nordmann	9.88e-08 ±1.41e-08	a	2.53e-08 ±1.14e-08	b
C	Trojan	0 ±0	nsd	8.96e-09 ±6.13e-09	nsd
C	Noble	0 ±0	b	8.29e-08 ±2.5e-08	a
Peak 10*	Species	Needle		Stem
B	Fraser	8.95e-09 ±2.29e-09	nsd	1.09e-08 ±2.66e-09	nsd
A	Concolor	7.97e-08 ±1.32e-08	nsd	3.78e-08 ±2.29e-09	nsd
C	Nordmann	3.85e-09 ±1.5e-09	a	0 ±0	b
C	Trojan	3.09e-09 ±3.09e-09	nsd	0 ±0	nsd
A	Noble	1.22e-08 ±2.41e-09	b	4.02e-08 ±6.32e-09	a
Peak 11*	Species	Needle		Stem
B	Fraser	0 ±0	nsd	0 ±0	nsd
B	Concolor	0 ±0	nsd	0 ±0	nsd
B	Nordmann	0 ±0	nsd	0 ±0	nsd
A	Trojan	3.76e-08 ±5.45e-09	a	0 ±0	b
B	Noble	0 ±0	nsd	0 ±0	nsd
Peak 13	Species	Needle		Stem
B	Fraser	0 ±0	nsd	0 ±0	nsd
B	Concolor	0 ±0	nsd	0 ±0	nsd
AB	Nordmann	9.53e-10 ±9.53e-10	nsd	0 ±0	nsd
B	Trojan	0 ±0	nsd	0 ±0	nsd
A	Noble	1.34e-09 ±1.34e-09	nsd	1.59e-09 ±1.1e-09	nsd
Peak 15	Species	Needle		Stem
B	Fraser	0 ±0	nsd	0 ±0	nsd
B	Concolor	0 ±0	nsd	0 ±0	nsd
B	Nordmann	0 ±0	nsd	0 ±0	nsd
B	Trojan	0 ±0	nsd	0 ±0	nsd
A	Noble	0 ±0	nsd	3.18e-09 ±2.2e-09	nsd
Peak 16 *	Species	Needle		Stem
B	Fraser	0 ±0	nsd	0 ±0	nsd
B	Concolor	0 ±0	nsd	0 ±0	nsd
B	Nordmann	0 ±0	nsd	0 ±0	nsd
B	Trojan	0 ±0	nsd	0 ±0	nsd
A	Noble	2.79e-09 ±1.29e-09	b	4.39e-08 ±7.79e-09	a
Peak 17*	Species	Needle		Stem
B	Fraser	0 ±0	nsd	0 ±0	nsd
A	Concolor	6.65e-07 ±4.28e-08	a	1.28e-07 ±1.02e-08	b
B	Nordmann	0 ±0	nsd	0 ±0	nsd
B	Trojan	0 ±0	nsd	0 ±0	nsd
B	Noble	0 ±0	nsd	0 ±0	nsd
Peak 18*	Species	Needle		Stem
C	Fraser	8.25e-09 ±4.34e-09	a	0 ±0	b
B	Concolor	7.8e-10 ±7.8e-10	b	7.46e-09 ±1.74e-09	a
BC	Nordmann	4.88e-09 ±1.45e-09	a	0 ±0	b
C	Trojan	0 ±0	nsd	0 ±0	nsd
A	Noble	2.13e-08 ±2.63e-09	nsd	3.23e-08 ±3.88e-09	nsd
Peak 19*	Species	Needle		Stem
C	Fraser	1.87e-09 ±1.35e-09	nsd	0 ±0	nsd
A	Concolor	1.88e-06 ±1.77e-07	nsd	1.58e-07 ±1.63e-08	nsd
C	Nordmann	0 ±0	nsd	0 ±0	nsd
C	Trojan	0 ±0	nsd	0 ±0	nsd
B	Noble	2.51e-08 ±1.23e-08	a	0 ±0	b
Peak 20	Species	Needle		Stem
A	Fraser	1.74e-08 ±4.46e-09	nsd	2.33e-08 ±7.01e-09	nsd
B	Concolor	9.73e-09 ±9.73e-09	nsd	1.47e-08 ±8.12e-09	nsd
B	Nordmann	2.73e-10 ±2.73e-10	nsd	4.2e-10 ±4.2e-10	nsd
B	Trojan	0 ±0	nsd	0 ±0	nsd
B	Noble	0 ±0	nsd	0 ±0	nsd
Peak 21*	Species	Needle		Stem
A	Fraser	1.08e-08 ±3.6e-09	nsd	7.1e-09 ±4.34e-09	nsd
A	Concolor	9.87e-09 ±9.87e-09	b	1.63e-08 ±6.57e-09	a
B	Nordmann	0 ±0	nsd	0 ±0	nsd
B	Trojan	0 ±0	nsd	0 ±0	nsd
B	Noble	0 ±0	nsd	0 ±0	nsd
Peak 22*	Species	Needle		Stem
B	Fraser	4.02e-08 ±7.53e-09	a	0 ±0	b
A	Concolor	2.16e-06 ±1.62e-07	nsd	6.65e-07 ±1.29e-07	nsd
C	Nordmann	1.38e-08 ±1.38e-08	nsd	0 ±0	nsd
C	Trojan	1.31e-08 ±1.31e-08	nsd	0 ±0	nsd
C	Noble	1e-08 ±1e-08	nsd	0 ±0	nsd
Peak 23*	Species	Needle		Stem
B	Fraser	1.18e-07 ±1.31e-08	a	1.54e-09 ±1.54e-09	b
A	Concolor	1.79e-07 ±1.65e-08	nsd	3.74e-08 ±5.59e-09	nsd
BC	Nordmann	7.36e-08 ±1.06e-08	a	0 ±0	b
C	Trojan	1.9e-08 ±2.62e-09	a	0 ±0	b
D	Noble	0 ±0	nsd	0 ±0	nsd
Peak 24*	Species	Needle		Stem
B	Fraser	0 ±0	b	4.73e-08 ±8.64e-09	a
A	Concolor	7.15e-08 ±5.81e-09	nsd	4.17e-08 ±2.22e-09	nsd
B	Nordmann	2.71e-08 ±4.31e-09	a	0 ±0	b
B	Trojan	4.56e-08 ±3.59e-09	a	0 ±0	b
A	Noble	6.51e-08 ±6.53e-09	nsd	1.64e-07 ±2.37e-08	nsd
Peak 25*	Species	Needle		Stem
B	Fraser	6.28e-09 ±1.53e-09	nsd	1.03e-08 ±2.19e-09	nsd
A	Concolor	1.25e-07 ±8.29e-09	a	3.15e-08 ±8.33e-09	b
B	Nordmann	1.3e-07 ±1.2e-08	a	3e-09 ±1.73e-09	b
B	Trojan	6.3e-08 ±5.26e-09	a	0 ±0	b
B	Noble	0 ±0	b	3.48e-08 ±3.77e-09	a
Peak 27*	Species	Needle		Stem
A	Fraser	3.78e-09 ±1.13e-09	a	0 ±0	b
B	Concolor	0 ±0	nsd	0 ±0	nsd
A	Nordmann	0 ±0	b	3.4e-09 ±1.24e-09	a
A	Trojan	0 ±0	b	2.2e-08 ±6.59e-09	a
A	Noble	0 ±0	b	3.5e-09 ±1.33e-09	a
Peak 29*	Species	Needle		Stem
B	Fraser	0 ±0	nsd	0 ±0	nsd
A	Concolor	1.06e-08 ±2.03e-09	a	0 ±0	b
B	Nordmann	0 ±0	nsd	0 ±0	nsd
B	Trojan	0 ±0	nsd	0 ±0	nsd
B	Noble	0 ±0	nsd	0 ±0	nsd
Peak 31*	Species	Needle		Stem
B	Fraser	0 ±0	nsd	0 ±0	nsd
B	Concolor	0 ±0	nsd	0 ±0	nsd
B	Nordmann	0 ±0	nsd	0 ±0	nsd
A	Trojan	1.34e-08 ±3.99e-09	a	0 ±0	b
B	Noble	0 ±0	nsd	0 ±0	nsd
Peak 32*	Species	Needle		Stem
A	Fraser	1.34e-08 ±2.23e-09	a	0 ±0	b
B	Concolor	0 ±0	nsd	0 ±0	nsd
B	Nordmann	0 ±0	nsd	0 ±0	nsd
B	Trojan	0 ±0	nsd	0 ±0	nsd
B	Noble	0 ±0	nsd	0 ±0	nsd
Peak 33*	Species	Needle		Stem
B	Fraser	2.02e-08 ±6.82e-10	a	5.58e-09 ±1.24e-09	b
A	Concolor	3.94e-08 ±3.43e-09	a	1.27e-08 ±1.32e-09	b
C	Nordmann	6.67e-10 ±4.59e-10	nsd	0 ±0	nsd
C	Trojan	0 ±0	nsd	0 ±0	nsd
B	Noble	1.18e-08 ±1.38e-09	nsd	1.63e-08 ±2.33e-09	nsd
Peak 34*	Species	Needle		Stem
B	Fraser	1.62e-09 ±8.7e-10	nsd	0 ±0	nsd
A	Concolor	2.38e-07 ±2.96e-08	a	1.76e-08 ±5.94e-09	b
B	Nordmann	0 ±0	nsd	0 ±0	nsd
B	Trojan	0 ±0	nsd	0 ±0	nsd
A	Noble	4.32e-08 ±9.18e-09	a	8.28e-09 ±2.39e-09	b
Peak 35*	Species	Needle		Stem
B	Fraser	0 ±0	nsd	0 ±0	nsd
A	Concolor	0 ±0	nsd	0 ±0	nsd
B	Nordmann	0 ±0	nsd	0 ±0	nsd
B	Trojan	0 ±0	nsd	0 ±0	nsd
A	Noble	1.98e-08 ±3.61e-09	a	0 ±0	b
Peak 36*	Species	Needle		Stem
B	Fraser	0 ±0	nsd	0 ±0	nsd
A	Concolor	1.26e-07 ±9.19e-09	a	0 ±0	b
B	Nordmann	0 ±0	nsd	0 ±0	nsd
B	Trojan	0 ±0	nsd	0 ±0	nsd
B	Noble	0 ±0	nsd	0 ±0	nsd
Peak 37*	Species	Needle		Stem
B	Fraser	0 ±0	nsd	0 ±0	nsd
A	Concolor	2.02e-08 ±5.23e-09	a	0 ±0	b
B	Nordmann	0 ±0	nsd	0 ±0	nsd
B	Trojan	0 ±0	nsd	0 ±0	nsd
B	Noble	0 ±0	nsd	0 ±0	nsd
Peak 39*	Species	Needle		Stem
B	Fraser	0 ±0	nsd	0 ±0	nsd
A	Concolor	8.04e-08 ±9.89e-09	nsd	3.15e-08 ±2.78e-09	nsd
B	Nordmann	0 ±0	nsd	0 ±0	nsd
B	Trojan	0 ±0	nsd	0 ±0	nsd
B	Noble	0 ±0	nsd	0 ±0	nsd
Peak 40*	Species	Needle		Stem
C	Fraser	0 ±0	nsd	0 ±0	nsd
C	Concolor	0 ±0	nsd	0 ±0	nsd
B	Nordmann	1.34e-09 ±1.34e-09	nsd	5.05e-10 ±5.05e-10	nsd
A	Trojan	1.77e-08 ±3.69e-09	a	1.55e-09 ±1.55e-09	b
C	Noble	0 ±0	nsd	0 ±0	nsd
Peak 41*	Species	Needle		Stem
C	Fraser	0 ±0	nsd	0 ±0	nsd
C	Concolor	2.74e-09 ±2e-09	a	0 ±0	b
B	Nordmann	5.91e-08 ±3.01e-09	a	0 ±0	b
A	Trojan	1.28e-07 ±4.52e-09	a	7.99e-09 ±1.51e-09	b
B	Noble	6.15e-08 ±2.96e-09	a	0 ±0	b
Peak 42*	Species	Needle		Stem
B	Fraser	1.95e-10 ±1.95e-10	nsd	0 ±0	nsd
A	Concolor	8.15e-09 ±2.83e-09	a	3.51e-09 ±6.46e-10	b
B	Nordmann	0 ±0	nsd	0 ±0	nsd
B	Trojan	0 ±0	nsd	0 ±0	nsd
B	Noble	0 ±0	nsd	0 ±0	nsd
Peak 43*	Species	Needle		Stem
B	Fraser	0 ±0	nsd	0 ±0	nsd
B	Concolor	0 ±0	nsd	0 ±0	nsd
B	Nordmann	0 ±0	nsd	0 ±0	nsd
A	Trojan	2.2e-08 ±1.62e-09	a	0 ±0	b
B	Noble	0 ±0	nsd	0 ±0	nsd
Peak 44*	Species	Needle		Stem
B	Fraser	0 ±0	nsd	0 ±0	nsd
A	Concolor	0 ±0	b	3.9e-08 ±2.09e-08	a
B	Nordmann	0 ±0	nsd	0 ±0	nsd
B	Trojan	0 ±0	nsd	0 ±0	nsd
B	Noble	0 ±0	nsd	0 ±0	nsd
Peak 45*	Species	Needle		Stem
B	Fraser	0 ±0	nsd	0 ±0	nsd
A	Concolor	1.65e-06 ±7.19e-08	a	9.83e-08 ±1.39e-08	b
B	Nordmann	0 ±0	nsd	0 ±0	nsd
B	Trojan	0 ±0	nsd	0 ±0	nsd
B	Noble	0 ±0	nsd	0 ±0	nsd
Peak 46	Species	Needle		Stem
B	Fraser	0 ±0	nsd	0 ±0	nsd
B	Concolor	0 ±0	nsd	0 ±0	nsd
B	Nordmann	1.13e-09 ±1.13e-09	a	0 ±0	b
B	Trojan	0 ±0	nsd	0 ±0	nsd
A	Noble	3.69e-06 ±1.73e-07	nsd	4.48e-06 ±3.46e-07	nsd
Peak 47*	Species	Needle		Stem
B	Fraser	0 ±0	nsd	0 ±0	nsd
B	Concolor	0 ±0	nsd	0 ±0	nsd
B	Nordmann	0 ±0	nsd	0 ±0	nsd
A	Trojan	9.46e-08 ±2.91e-09	a	0 ±0	b
B	Noble	0 ±0	nsd	0 ±0	nsd
Peak 48*	Species	Needle		Stem
B	Fraser	9.96e-09 ±1.49e-09	a	0 ±0	b
C	Concolor	0 ±0	nsd	0 ±0	nsd
A	Nordmann	6.41e-08 ±2.08e-09	a	0 ±0	b
C	Trojan	0 ±0	nsd	0 ±0	nsd
C	Noble	0 ±0	nsd	0 ±0	nsd
Peak 49*	Species	Needle		Stem
C	Fraser	0 ±0	nsd	0 ±0	nsd
A	Concolor	8.2e-07 ±4.48e-08	nsd	4.82e-07 ±1.8e-08	nsd
B	Nordmann	9.73e-09 ±2.37e-09	a	0 ±0	b
C	Trojan	0 ±0	nsd	0 ±0	nsd
C	Noble	1.73e-09 ±1.18e-09	nsd	3.67e-10 ±3.67e-10	nsd
Peak 50*	Species	Needle		Stem
A	Fraser	8.41e-09 ±1.55e-09	a	0 ±0	b
B	Concolor	3.42e-09 ±1.83e-09	a	0 ±0	b
C	Nordmann	0 ±0	nsd	0 ±0	nsd
C	Trojan	0 ±0	nsd	0 ±0	nsd
C	Noble	0 ±0	nsd	0 ±0	nsd
Peak 51*	Species	Needle		Stem
B	Fraser	0 ±0	nsd	0 ±0	nsd
B	Concolor	0 ±0	nsd	0 ±0	nsd
B	Nordmann	0 ±0	nsd	0 ±0	nsd
A	Trojan	4.34e-08 ±3.9e-09	a	2.02e-09 ±9.13e-10	b
A	Noble	1.05e-08 ±2.79e-09	a	1.2e-08 ±2.11e-09	b
Peak 52*	Species	Needle		Stem
A	Fraser	2.48e-08 ±2.66e-09	b	2.98e-07 ±1.69e-08	a
A	Concolor	4.79e-08 ±2.82e-09	nsd	2.07e-08 ±1.24e-09	nsd
B	Nordmann	8.11e-07 ±4.11e-08	a	3.85e-09 ±7.41e-10	b
C	Trojan	0 ±0	nsd	0 ±0	nsd
C	Noble	0 ±0	nsd	0 ±0	nsd
Peak 53*	Species	Needle		Stem
C	Fraser	0 ±0	nsd	0 ±0	nsd
A	Concolor	5.39e-07 ±2.04e-08	a	1.01e-08 ±2.14e-09	b
C	Nordmann	0 ±0	nsd	0 ±0	nsd
C	Trojan	0 ±0	nsd	0 ±0	nsd
B	Noble	3.32e-08 ±7.84e-09	a	0 ±0	b
Peak 54*	Species	Needle		Stem
B	Fraser	6.24e-09 ±3.39e-09	b	7.52e-08 ±5.96e-09	a
C	Concolor	0 ±0	nsd	0 ±0	nsd
B	Nordmann	1.26e-07 ±6.46e-09	a	0 ±0	b
C	Trojan	0 ±0	nsd	0 ±0	nsd
A	Noble	2.98e-08 ±3.74e-09	nsd	1.55e-08 ±2.2e-09	nsd
Peak 55*	Species	Needle		Stem
A	Fraser	0 ±0	b	3.32e-08 ±4.93e-09	a
B	Concolor	0 ±0	nsd	0 ±0	nsd
B	Nordmann	0 ±0	nsd	0 ±0	nsd
B	Trojan	0 ±0	nsd	0 ±0	nsd
B	Noble	0 ±0	nsd	0 ±0	nsd
Peak 56*	Species	Needle		Stem
C	Fraser	0 ±0	nsd	0 ±0	nsd
A	Concolor	1.04e-06 ±6.13e-08	nsd	5.57e-07 ±2.67e-08	nsd
B	Nordmann	1.3e-08 ±4.35e-09	a	0 ±0	b
B	Trojan	6.44e-09 ±3.06e-09	a	0 ±0	b
B	Noble	2.83e-08 ±8.69e-09	a	0 ±0	b
Peak 57*	Species	Needle		Stem
B	Fraser	0 ±0	nsd	0 ±0	nsd
A	Concolor	7.21e-07 ±6.07e-08	a	1.96e-07 ±6.06e-08	b
B	Nordmann	0 ±0	nsd	0 ±0	nsd
B	Trojan	0 ±0	nsd	0 ±0	nsd
B	Noble	0 ±0	nsd	0 ±0	nsd
Peak 58*	Species	Needle		Stem
D	Fraser	0 ±0	nsd	0 ±0	nsd
D	Concolor	0 ±0	nsd	0 ±0	nsd
C	Nordmann	0 ±0	b	3.53e-09 ±1.33e-09	a
B	Trojan	2.87e-07 ±1e-08	nsd	4.87e-08 ±3.56e-09	nsd
A	Noble	8.97e-07 ±5.25e-08	nsd	1.14e-06 ±8.62e-08	nsd
Peak 59*	Species	Needle		Stem
C	Fraser	0 ±0	nsd	0 ±0	nsd
C	Concolor	0 ±0	nsd	0 ±0	nsd
C	Nordmann	0 ±0	nsd	0 ±0	nsd
B	Trojan	1.3e-08 ±5.21e-09	a	0 ±0	b
A	Noble	5.21e-08 ±8.58e-09	a	0 ±0	b
Peak 60*	Species	Needle		Stem
A	Fraser	1.21e-08 ±3.13e-09	b	1.34e-07 ±7.8e-09	a
C	Concolor	0 ±0	nsd	0 ±0	nsd
B	Nordmann	5.89e-08 ±5.81e-09	a	0 ±0	b
C	Trojan	0 ±0	nsd	0 ±0	nsd
C	Noble	0 ±0	nsd	0 ±0	nsd
Peak 61	Species	Needle		Stem
C	Fraser	0 ±0	nsd	0 ±0	nsd
C	Concolor	0 ±0	nsd	9.93e-10 ±9.93e-10	nsd
B	Nordmann	3.49e-08 ±1.59e-08	a	0 ±0	b
A	Trojan	9.89e-08 ±3.28e-08	nsd	2.42e-08 ±4.93e-09	nsd
A	Noble	2.19e-08 ±3.58e-09	nsd	2.34e-08 ±4.97e-09	nsd
Peak 62*	Species	Needle		Stem
A	Fraser	0 ±0	b	8.62e-08 ±2.03e-08	a
C	Concolor	0 ±0	nsd	0 ±0	nsd
C	Nordmann	0 ±0	nsd	0 ±0	nsd
C	Trojan	0 ±0	nsd	0 ±0	nsd
B	Noble	3.67e-09 ±2.5e-09	nsd	4.91e-09 ±2.63e-09	nsd
Peak 63*	Species	Needle		Stem
B	Fraser	0 ±0	nsd	0 ±0	nsd
B	Concolor	0 ±0	nsd	0 ±0	nsd
A	Nordmann	9.75e-08 ±1.68e-08	a	0 ±0	b
A	Trojan	1.54e-07 ±3.45e-08	a	0 ±0	b
B	Noble	0 ±0	nsd	2.86e-09 ±2.86e-09	nsd
Peak 64	Species	Needle		Stem
B	Fraser	0 ±0	nsd	0 ±0	nsd
B	Concolor	0 ±0	nsd	0 ±0	nsd
B	Nordmann	0 ±0	nsd	0 ±0	nsd
B	Trojan	0 ±0	nsd	0 ±0	nsd
A	Noble	2.06e-08 ±2.53e-09	nsd	1.49e-08 ±2.28e-09	nsd
Peak 65*	Species	Needle		Stem
B	Fraser	0 ±0	nsd	0 ±0	nsd
B	Concolor	0 ±0	nsd	0 ±0	nsd
B	Nordmann	0 ±0	nsd	0 ±0	nsd
B	Trojan	0 ±0	nsd	0 ±0	nsd
A	Noble	1.71e-07 ±9e-09	a	9e-09 ±9e-09	b
Peak 66*	Species	Needle		Stem
A	Fraser	9.93e-08 ±1.62e-08	b	1.61e-06 ±8.44e-08	a
C	Concolor	0 ±0	nsd	0 ±0	nsd
B	Nordmann	4.45e-07 ±3.93e-08	a	0 ±0	b
C	Trojan	0 ±0	nsd	0 ±0	nsd
C	Noble	0 ±0	nsd	0 ±0	nsd
Peak 68*	Species	Needle		Stem
B	Fraser	0 ±0	nsd	0 ±0	nsd
A	Concolor	0 ±0	b	2.75e-08 ±7.62e-09	a
B	Nordmann	0 ±0	nsd	0 ±0	nsd
B	Trojan	0 ±0	nsd	0 ±0	nsd
B	Noble	0 ±0	nsd	0 ±0	nsd
Peak 69*	Species	Needle		Stem
C	Fraser	0 ±0	nsd	0 ±0	nsd
C	Concolor	0 ±0	nsd	0 ±0	nsd
C	Nordmann	7.53e-10 ±7.53e-10	a	0 ±0	b
B	Trojan	5.78e-08 ±3e-09	a	0 ±0	b
A	Noble	9.96e-08 ±3.79e-09	nsd	7.29e-08 ±4.19e-09	nsd
Peak 70*	Species	Needle		Stem
B	Fraser	3.43e-08 ±1.84e-08	b	1.5e-07 ±1.03e-08	a
A	Concolor	2.12e-07 ±2.49e-08	a	6.56e-08 ±1.21e-08	b
A	Nordmann	1.32e-07 ±7.09e-09	a	1.41e-08 ±3.74e-09	b
C	Trojan	3.05e-08 ±4.65e-09	a	1.17e-08 ±1.17e-08	b
D	Noble	0 ±0	nsd	0 ±0	nsd
Peak 71*	Species	Needle		Stem
A	Fraser	1.64e-07 ±2.32e-08	a	0 ±0	b
B	Concolor	0 ±0	nsd	0 ±0	nsd
B	Nordmann	0 ±0	nsd	0 ±0	nsd
A	Trojan	0 ±0	b	5.12e-08 ±5.83e-09	a
B	Noble	0 ±0	nsd	0 ±0	nsd
Peak 72*	Species	Needle		Stem
B	Fraser	0 ±0	nsd	0 ±0	nsd
A	Concolor	3.21e-07 ±3.55e-08	nsd	1.97e-07 ±1.03e-08	nsd
B	Nordmann	0 ±0	nsd	0 ±0	nsd
B	Trojan	0 ±0	nsd	0 ±0	nsd
B	Noble	0 ±0	nsd	0 ±0	nsd
Peak 73*	Species	Needle		Stem
B	Fraser	0 ±0	nsd	0 ±0	nsd
B	Concolor	0 ±0	nsd	0 ±0	nsd
B	Nordmann	0 ±0	nsd	0 ±0	nsd
B	Trojan	0 ±0	nsd	0 ±0	nsd
A	Noble	4.15e-07 ±1.84e-08	a	3.01e-07 ±1.56e-08	b
Peak 75	Species	Needle		Stem
B	Fraser	0 ±0	nsd	0 ±0	nsd
B	Concolor	0 ±0	nsd	0 ±0	nsd
B	Nordmann	0 ±0	nsd	0 ±0	nsd
B	Trojan	0 ±0	nsd	0 ±0	nsd
A	Noble	8.57e-08 ±7.79e-09	nsd	6.79e-08 ±3.72e-09	nsd
Peak 76*	Species	Needle		Stem
C	Fraser	0 ±0	b	1.32e-08 ±3.81e-09	a
A	Concolor	5.46e-07 ±5.55e-08	nsd	3.41e-07 ±1.83e-08	nsd
B	Nordmann	4.11e-07 ±2.03e-08	a	5.13e-10 ±5.13e-10	b
B	Trojan	9.46e-08 ±8.25e-09	a	4.65e-09 ±2.82e-09	b
B	Noble	5.83e-08 ±2.25e-08	a	1.45e-07 ±2.13e-08	b
Peak 77	Species	Needle		Stem
A	Fraser	8.58e-08 ±1.74e-08	a	6.42e-08 ±5.43e-09	b
B	Concolor	0 ±0	nsd	0 ±0	nsd
B	Nordmann	0 ±0	nsd	0 ±0	nsd
B	Trojan	0 ±0	nsd	0 ±0	nsd
B	Noble	0 ±0	nsd	0 ±0	nsd
Peak 78*	Species	Needle		Stem
B	Fraser	0 ±0	nsd	0 ±0	nsd
B	Concolor	0 ±0	nsd	0 ±0	nsd
B	Nordmann	0 ±0	nsd	0 ±0	nsd
B	Trojan	0 ±0	nsd	0 ±0	nsd
A	Noble	4.17e-07 ±2.72e-08	a	3.38e-07 ±3.05e-08	b
Peak 79*	Species	Needle		Stem
C	Fraser	0 ±0	nsd	0 ±0	nsd
B	Concolor	1.74e-08 ±9.51e-09	b	2.03e-07 ±6.65e-08	a
C	Nordmann	0 ±0	nsd	0 ±0	nsd
C	Trojan	0 ±0	nsd	0 ±0	nsd
A	Noble	3.1e-07 ±7.18e-08	b	4.5e-07 ±2.33e-08	a
Peak 80*	Species	Needle		Stem
AB	Fraser	1.81e-08 ±1.11e-08	a	0 ±0	b
B	Concolor	1.09e-08 ±1.09e-08	nsd	0 ±0	nsd
B	Nordmann	0 ±0	nsd	7.93e-09 ±7.93e-09	nsd
B	Trojan	0 ±0	nsd	0 ±0	nsd
A	Noble	8.38e-08 ±2.83e-08	a	0 ±0	b
Peak 81*	Species	Needle		Stem
B	Fraser	0 ±0	nsd	0 ±0	nsd
B	Concolor	0 ±0	nsd	0 ±0	nsd
B	Nordmann	0 ±0	nsd	0 ±0	nsd
A	Trojan	1.83e-06 ±6.29e-08	a	3.02e-07 ±2.41e-08	b
B	Noble	0 ±0	nsd	0 ±0	nsd
Peak 82*	Species	Needle		Stem
B	Fraser	0 ±0	b	2.54e-07 ±1.43e-08	a
C	Concolor	0 ±0	nsd	0 ±0	nsd
A	Nordmann	7.67e-07 ±3.9e-08	a	1.01e-08 ±8.54e-10	b
C	Trojan	0 ±0	nsd	0 ±0	nsd
C	Noble	0 ±0	nsd	0 ±0	nsd
Peak 83*	Species	Needle		Stem
C	Fraser	0 ±0	nsd	0 ±0	nsd
A	Concolor	1.46e-07 ±3.55e-08	a	7.5e-08 ±2.83e-08	b
C	Nordmann	0 ±0	nsd	0 ±0	nsd
C	Trojan	0 ±0	nsd	0 ±0	nsd
B	Noble	2.03e-07 ±6.91e-08	a	0 ±0	b
Peak 84*	Species	Needle		Stem
A	Fraser	3.06e-08 ±6.97e-09	a	0 ±0	b
B	Concolor	0 ±0	nsd	0 ±0	nsd
B	Nordmann	0 ±0	nsd	0 ±0	nsd
B	Trojan	0 ±0	nsd	0 ±0	nsd
B	Noble	0 ±0	nsd	0 ±0	nsd
Peak 85*	Species	Needle		Stem
C	Fraser	0 ±0	nsd	0 ±0	nsd
C	Concolor	0 ±0	nsd	0 ±0	nsd
B	Nordmann	1.95e-06 ±1.01e-07	a	1.64e-08 ±1.41e-09	b
B	Trojan	2.81e-07 ±1.04e-08	a	3.81e-08 ±3.92e-09	b
A	Noble	4.13e-07 ±2.17e-08	nsd	3.7e-07 ±1.93e-08	nsd
Peak 86*	Species	Needle		Stem
B	Fraser	0 ±0	nsd	0 ±0	nsd
B	Concolor	0 ±0	nsd	0 ±0	nsd
A	Nordmann	1.95e-06 ±1.01e-07	a	5.59e-09 ±2.18e-09	b
B	Trojan	0 ±0	nsd	0 ±0	nsd
B	Noble	0 ±0	nsd	0 ±0	nsd
Peak 87*	Species	Needle		Stem
B	Fraser	0 ±0	nsd	0 ±0	nsd
A	Concolor	1.29e-06 ±2.3e-07	a	3.09e-07 ±1.38e-07	b
B	Nordmann	0 ±0	nsd	0 ±0	nsd
B	Trojan	0 ±0	nsd	0 ±0	nsd
B	Noble	0 ±0	nsd	0 ±0	nsd
Peak 88*	Species	Needle		Stem
B	Fraser	0 ±0	nsd	0 ±0	nsd
A	Concolor	5.04e-07 ±2.34e-07	b	7.72e-07 ±1.31e-07	a
B	Nordmann	0 ±0	nsd	0 ±0	nsd
B	Trojan	0 ±0	nsd	0 ±0	nsd
B	Noble	0 ±0	nsd	0 ±0	nsd
Peak 89	Species	Needle		Stem
A	Fraser	1.3e-06 ±5.53e-08	nsd	9.04e-07 ±6.65e-08	nsd
B	Concolor	0 ±0	nsd	0 ±0	nsd
B	Nordmann	0 ±0	nsd	5.6e-09 ±5.6e-09	nsd
B	Trojan	0 ±0	nsd	1.93e-08 ±1.93e-08	nsd
B	Noble	0 ±0	nsd	0 ±0	nsd
Peak 90*	Species	Needle		Stem
C	Fraser	0 ±0	nsd	0 ±0	nsd
C	Concolor	0 ±0	nsd	0 ±0	nsd
B	Nordmann	0 ±0	b	2.67e-09 ±8.87e-10	a
C	Trojan	0 ±0	nsd	0 ±0	nsd
A	Noble	6.24e-07 ±2.73e-08	nsd	4.76e-07 ±2.8e-08	nsd
Peak 91*	Species	Needle		Stem
A	Fraser	0 ±0	b	7.12e-08 ±6.39e-09	a
B	Concolor	0 ±0	b	1.7e-08 ±6.02e-09	b
A	Nordmann	6.81e-07 ±2.68e-08	a	0 ±0	b
C	Trojan	0 ±0	nsd	0 ±0	nsd
C	Noble	0 ±0	nsd	0 ±0	nsd
Peak 92*	Species	Needle		Stem
B	Fraser	0 ±0	nsd	0 ±0	nsd
B	Concolor	0 ±0	nsd	0 ±0	nsd
B	Nordmann	0 ±0	nsd	0 ±0	nsd
A	Trojan	1.05e-06 ±3.75e-08	a	1.26e-07 ±1.26e-08	b
B	Noble	0 ±0	nsd	0 ±0	nsd
Peak 93*	Species	Needle		Stem
C	Fraser	0 ±0	nsd	0 ±0	nsd
C	Concolor	0 ±0	nsd	0 ±0	nsd
B	Nordmann	0 ±0	b	1.26e-08 ±1.48e-09	a
C	Trojan	0 ±0	nsd	0 ±0	nsd
A	Noble	4.79e-08 ±2.56e-08	a	0 ±0	b
Peak 94*	Species	Needle		Stem
D	Fraser	4.1e-09 ±4.1e-09	nsd	0 ±0	nsd
A	Concolor	8.78e-06 ±4.43e-07	nsd	4.95e-06 ±2.23e-07	nsd
B	Nordmann	7.64e-08 ±8.45e-09	a	0 ±0	b
C	Trojan	6.7e-08 ±1.83e-08	a	1.11e-09 ±1.11e-09	b
D	Noble	0 ±0	nsd	0 ±0	nsd
Peak 95*	Species	Needle		Stem
A	Fraser	3.43e-08 ±5.33e-09	a	3.42e-08 ±7.09e-09	b
B	Concolor	0 ±0	nsd	0 ±0	nsd
B	Nordmann	0 ±0	nsd	0 ±0	nsd
B	Trojan	0 ±0	nsd	0 ±0	nsd
B	Noble	0 ±0	nsd	0 ±0	nsd
Peak 96*	Species	Needle		Stem
C	Fraser	0 ±0	nsd	0 ±0	nsd
C	Concolor	0 ±0	nsd	0 ±0	nsd
C	Nordmann	0 ±0	nsd	0 ±0	nsd
B	Trojan	5.4e-08 ±1.56e-08	b	1.8e-08 ±2.59e-09	a
A	Noble	1.94e-07 ±2.7e-08	b	2.21e-07 ±1.35e-08	a
Peak 97*	Species	Needle		Stem
C	Fraser	0 ±0	nsd	0 ±0	nsd
C	Concolor	0 ±0	nsd	0 ±0	nsd
C	Nordmann	0 ±0	nsd	0 ±0	nsd
A	Trojan	1.7e-07 ±1.92e-08	a	1.69e-08 ±2.96e-09	b
B	Noble	0 ±0	b	4.03e-09 ±1.58e-09	a
Peak 98*	Species	Needle		Stem
B	Fraser	0 ±0	nsd	0 ±0	nsd
B	Concolor	0 ±0	nsd	0 ±0	nsd
A	Nordmann	3.99e-08 ±2.07e-09	a	0 ±0	b
B	Trojan	0 ±0	nsd	0 ±0	nsd
B	Noble	0 ±0	nsd	0 ±0	nsd
Peak 99*	Species	Needle		Stem
B	Fraser	0 ±0	nsd	0 ±0	nsd
B	Concolor	0 ±0	nsd	0 ±0	nsd
B	Nordmann	0 ±0	nsd	0 ±0	nsd
B	Trojan	2.5e-08 ±1.71e-08	nsd	0 ±0	nsd
A	Noble	7.27e-10 ±7.27e-10	b	4.61e-09 ±1.38e-09	a
Peak 100*	Species	Needle		Stem
B	Fraser	0 ±0	nsd	0 ±0	nsd
B	Concolor	0 ±0	nsd	0 ±0	nsd
A	Nordmann	3.42e-07 ±2.04e-08	a	0 ±0	nsd
B	Trojan	0 ±0	nsd	0 ±0	nsd
B	Noble	0 ±0	nsd	0 ±0	nsd
Peak 101*	Species	Needle		Stem
A	Fraser	4.11e-07 ±6.71e-08	nsd	2.11e-06 ±1.58e-07	nsd
B	Concolor	0 ±0	nsd	0 ±0	nsd
B	Nordmann	0 ±0	nsd	4.39e-09 ±4.39e-09	nsd
B	Trojan	7.87e-09 ±7.87e-09	nsd	1.17e-08 ±1.17e-08	nsd
B	Noble	9.21e-09 ±6.04e-09	a	0 ±0	b
Peak 102*	Species	Needle		Stem
C	Fraser	0 ±0	nsd	0 ±0	nsd
A	Concolor	1.91e-07 ±1.82e-08	nsd	1.21e-07 ±1.04e-08	nsd
C	Nordmann	0 ±0	nsd	0 ±0	nsd
C	Trojan	0 ±0	nsd	0 ±0	nsd
B	Noble	1.19e-08 ±3.97e-09	a	2.73e-09 ±1.97e-09	b
Peak 103*	Species	Needle		Stem
A	Fraser	3.64e-08 ±2.86e-09	nsd	1.28e-08 ±2.39e-09	nsd
C	Concolor	0 ±0	nsd	0 ±0	nsd
B	Nordmann	0 ±0	nsd	3.19e-09 ±7.04e-10	nsd
C	Trojan	0 ±0	nsd	0 ±0	nsd
C	Noble	0 ±0	nsd	0 ±0	nsd
Peak 105*	Species	Needle		Stem
D	Fraser	0 ±0	nsd	3.05e-09 ±2.19e-09	nsd
C	Concolor	3.4e-08 ±1.82e-08	a	1.74e-07 ±6.36e-08	b
D	Nordmann	0 ±0	nsd	0 ±0	nsd
B	Trojan	6.56e-08 ±3.63e-09	a	0 ±0	b
A	Noble	5.88e-07 ±2.69e-08	nsd	7.15e-07 ±4.86e-08	nsd
Peak 106*	Species	Needle		Stem
D	Fraser	0 ±0	nsd	0 ±0	nsd
B	Concolor	5.78e-08 ±1.44e-08	nsd	4.54e-08 ±1.08e-08	nsd
D	Nordmann	0 ±0	nsd	0 ±0	nsd
C	Trojan	1.41e-08 ±3.76e-09	a	0 ±0	b
A	Noble	5.72e-08 ±5.59e-09	nsd	3.82e-08 ±1.79e-09	nsd
Peak 107*	Species	Needle		Stem
C	Fraser	0 ±0	nsd	0 ±0	nsd
A	Concolor	4.26e-07 ±3.51e-08	nsd	2.8e-07 ±3.09e-08	nsd
C	Nordmann	0 ±0	nsd	0 ±0	nsd
B	Trojan	9.8e-09 ±5.34e-09	a	0 ±0	b
A	Noble	2.08e-07 ±8.12e-09	nsd	2.66e-07 ±1.85e-08	nsd
Peak 108*	Species	Needle		Stem
B	Fraser	0 ±0	nsd	0 ±0	nsd
A	Concolor	6.82e-08 ±5.63e-09	a	2.9e-08 ±4.94e-09	b
B	Nordmann	0 ±0	nsd	0 ±0	nsd
B	Trojan	0 ±0	nsd	0 ±0	nsd
B	Noble	0 ±0	nsd	0 ±0	nsd
Peak 109*	Species	Needle		Stem
C	Fraser	0 ±0	nsd	0 ±0	nsd
C	Concolor	0 ±0	nsd	0 ±0	nsd
B	Nordmann	0 ±0	b	1.91e-08 ±4.3e-09	a
A	Trojan	2.28e-08 ±2.8e-09	a	5.53e-09 ±2.97e-09	b
C	Noble	0 ±0	nsd	0 ±0	nsd
Peak 110*	Species	Needle		Stem
B	Fraser	0 ±0	nsd	0 ±0	nsd
B	Concolor	0 ±0	nsd	0 ±0	nsd
A	Nordmann	2.52e-07 ±1.51e-08	a	0 ±0	b
B	Trojan	0 ±0	nsd	0 ±0	nsd
B	Noble	0 ±0	nsd	0 ±0	nsd
Peak 111*	Species	Needle		Stem
D	Fraser	0 ±0	nsd	0 ±0	nsd
B	Concolor	2.74e-07 ±5.99e-08	nsd	2.52e-07 ±5.42e-08	nsd
C	Nordmann	4.41e-09 ±1.55e-09	a	0 ±0	b
C	Trojan	1.41e-08 ±7.58e-09	nsd	0 ±0	nsd
A	Noble	8.88e-07 ±3.41e-08	nsd	1.22e-06 ±9.48e-08	nsd
Peak 112*	Species	Needle		Stem
A	Fraser	1.14e-08 ±1.35e-09	a	0 ±0	b
B	Concolor	0 ±0	nsd	0 ±0	nsd
B	Nordmann	0 ±0	nsd	0 ±0	nsd
B	Trojan	0 ±0	nsd	0 ±0	nsd
B	Noble	0 ±0	nsd	0 ±0	nsd
Peak 113*	Species	Needle		Stem
B	Fraser	0 ±0	nsd	0 ±0	nsd
B	Concolor	0 ±0	nsd	0 ±0	nsd
A	Nordmann	3.47e-07 ±1.87e-08	a	0 ±0	b
B	Trojan	0 ±0	nsd	0 ±0	nsd
B	Noble	0 ±0	nsd	0 ±0	nsd
Peak 114*	Species	Needle		Stem
C	Fraser	0 ±0	ns	0 ±0	nsd
A	Concolor	5.06e-07 ±4.62e-08	nsd	3.13e-07 ±2.72e-08	nsd
C	Nordmann	0 ±0	nsd	0 ±0	nsd
A	Trojan	8.98e-07 ±3.68e-08	a	8.94e-08 ±4.7e-09	b
B	Noble	3.7e-07 ±1.34e-08	a	7.87e-08 ±4.21e-08	b
Peak 115*	Species	Needle		Stem
A	Fraser	0 ±0	b	8.67e-08 ±1.4e-08	a
B	Concolor	0 ±0	nsd	0 ±0	nsd
B	Nordmann	0 ±0	nsd	0 ±0	nsd
B	Trojan	0 ±0	nsd	0 ±0	nsd
B	Noble	0 ±0	nsd	0 ±0	nsd
Peak 116*	Species	Needle		Stem
C	Fraser	0 ±0	nsd	0 ±0	nsd
C	Concolor	0 ±0	nsd	0 ±0	nsd
B	Nordmann	3.18e-07 ±2.93e-08	a	0 ±0	b
C	Trojan	0 ±0	nsd	0 ±0	nsd
A	Noble	2.41e-07 ±1.94e-08	nsd	1.32e-07 ±1.08e-08	nsd
Peak 117*	Species	Needle		Stem
A	Fraser	7.47e-07 ±6.24e-08	a	3.19e-09 ±3.19e-09	b
D	Concolor	0 ±0	nsd	0 ±0	nsd
C	Nordmann	0 ±0	b	5.05e-09 ±2.08e-09	a
B	Trojan	0 ±0	b	3.98e-08 ±7.36e-09	a
D	Noble	0 ±0		0 ±0
Peak 118*	Species	Needle		Stem
B	Fraser	0 ±0	nsd	0 ±0	nsd
A	Concolor	7.76e-08 ±4.91e-09	a	3.77e-08 ±6.57e-09	b
B	Nordmann	0 ±0	nsd	0 ±0	nsd
B	Trojan	0 ±0	nsd	0 ±0	nsd
B	Noble	6.54e-09 ±4.46e-09	nsd	2.01e-09 ±2.01e-09	nsd
Peak 119*	Species	Needle		Stem
B	Fraser	0 ±0	nsd	0 ±0	nsd
A	Concolor	0 ±0	b	4.96e-08 ±1.63e-08	a
B	Nordmann	0 ±0	nsd	0 ±0	nsd
B	Trojan	0 ±0	nsd	0 ±0	nsd
B	Noble	0 ±0	nsd	0 ±0	nsd
Peak 120*	Species	Needle		Stem
C	Fraser	0 ±0	nsd	0 ±0	nsd
B	Concolor	7.57e-08 ±1.77e-08	a	3.8e-08 ±1.46e-08	b
C	Nordmann	0 ±0	nsd	0 ±0	nsd
B	Trojan	6.74e-08 ±7.99e-09	a	0 ±0	b
A	Noble	3.9e-07 ±3.25e-08	nsd	3.26e-07 ±1.98e-08	nsd
Peak 121*	Species	Needle		Stem
B	Fraser	0 ±0	b	3.17e-08 ±7.17e-09	a
C	Concolor	0 ±0	nsd	0 ±0	nsd
A	Nordmann	1.33e-07 ±1.19e-08	a	0 ±0	b
C	Trojan	0 ±0	nsd	0 ±0	nsd
C	Noble	0 ±0	nsd	0 ±0	nsd
Peak 122*	Species	Needle		Stem
B	Fraser	0 ±0	nsd	0 ±0	nsd
B	Concolor	0 ±0	nsd	0 ±0	nsd
B	Nordmann	0 ±0	nsd	0 ±0	nsd
A	Trojan	1.02e-05 ±3.38e-07	a	1.74e-06 ±1.09e-07	b
B	Noble	0 ±0	nsd	0 ±0	nsd
Peak 124*	Species	Needle		Stem
B	Fraser	0 ±0	nsd	0 ±0	nsd
B	Concolor	0 ±0	nsd	0 ±0	nsd
A	Nordmann	8.64e-08 ±8.83e-09	a	0 ±0	b
B	Trojan	0 ±0	nsd	0 ±0	nsd
B	Noble	0 ±0	nsd	0 ±0	nsd
Peak 125*	Species	Needle		Stem
A	Fraser	0 ±0	b	4.04e-08 ±4.22e-09	a
B	Concolor	0 ±0	b	5.95e-08 ±2.32e-08	a
C	Nordmann	0 ±0	nsd	0 ±0	nsd
B	Trojan	0 ±0	b	7.88e-09 ±3.16e-09	a
B	Noble	0 ±0	b	4.79e-08 ±1.55e-08	a
Peak 126*	Species	Needle		Stem
D	Fraser	1.82e-08 ±3.09e-09	a	0 ±0	b
B	Concolor	1.73e-07 ±1.85e-08	a	5.61e-09 ±2.21e-09	b
B	Nordmann	1.83e-07 ±1.49e-08	a	9.13e-10 ±4.13e-10	b
C	Trojan	1.13e-07 ±6.41e-09	a	0 ±0	b
A	Noble	1.59e-07 ±1.02e-08	nsd	1.7e-06 ±2.3e-07	nsd
Peak 127*	Species	Needle		Stem
C	Fraser	0 ±0	nsd	0 ±0	nsd
B	Concolor	0 ±0	b	3.17e-08 ±8.84e-09	a
C	Nordmann	0 ±0	nsd	0 ±0	nsd
A	Trojan	8.69e-08 ±1.22e-08	nsd	1.04e-08 ±1.23e-09	nsd
C	Noble	0 ±0	nsd	0 ±0	nsd
Peak 128*	Species	Needle		Stem
B	Fraser	0 ±0	nsd	0 ±0	nsd
B	Concolor	0 ±0	nsd	0 ±0	nsd
B	Nordmann	0 ±0	nsd	0 ±0	nsd
B	Trojan	0 ±0	nsd	0 ±0	nsd
A	Noble	0 ±0	b	1.42e-07 ±2.09e-08	a
Peak 129*	Species	Needle		Stem
B	Fraser	0 ±0	nsd	0 ±0	nsd
B	Concolor	0 ±0	nsd	0 ±0	nsd
B	Nordmann	0 ±0	nsd	0 ±0	nsd
B	Trojan	0 ±0	nsd	0 ±0	nsd
A	Noble	1.18e-08 ±2.91e-09	a	0 ±0	b
Peak 130*	Species	Needle		Stem
B	Fraser	0 ±0	nsd	0 ±0	nsd
B	Concolor	0 ±0	nsd	0 ±0	nsd
B	Nordmann	0 ±0	nsd	0 ±0	nsd
A	Trojan	6.51e-08 ±1.26e-08	a	1.66e-09 ±1.66e-09	b
B	Noble	0 ±0	nsd	0 ±0	nsd
Peak 131*	Species	Needle		Stem
D	Fraser	0 ±0	nsd	0 ±0	nsd
C	Concolor	2.7e-08 ±1.04e-08	a	0 ±0	b
B	Nordmann	3.97e-08 ±7.03e-09	a	0 ±0	b
D	Trojan	0 ±0	nsd	0 ±0	nsd
A	Noble	1.5e-07 ±1.45e-08	a	7.05e-08 ±1.85e-08	b
Peak 132*	Species	Needle		Stem
A	Fraser	0 ±0	b	1.06e-08 ±2.45e-09	a
B	Concolor	0 ±0	nsd	0 ±0	nsd
B	Nordmann	0 ±0	nsd	0 ±0	nsd
B	Trojan	0 ±0	nsd	0 ±0	nsd
B	Noble	0 ±0	nsd	0 ±0	nsd
