# Supplementary material for: Distinct terpene metabolite blends serve as core drivers of consumer aroma preferences in fir Christmas tree species
Source: Research Square preprint supplement (doi:10.21203/rs.3.rs-5760578/v1), 2025-04-21
Supplement: Supplementary file 4 [file 30393e312464d417e4ba6dd5.xlsx]

## Sheet: Sheet1
Table S9. Two-way ANOVA for each diterpene peak between species and tissue type.
Peaka	Componentb	DFc	Sum Sqd	Mean Sqe	F valuef	Pr(>F)g	Significanceh
133	Species	4	6197.68	1549.42	41.7598	1.07e-22	*
133	Tissue	1	228.532	228.532	6.15935	0.0143088	*
133	Species:Tissue	4	542.983	135.746	3.6586	0.00732245	*
133	Residual	134	4971.83	37.1032	NA	NA
134	Species	4	7302.78	1825.7	41.3559	1.53e-22	*
134	Tissue	1	4129.17	4129.17	93.5347	4.17e-17	*
134	Species:Tissue	4	3305.3	826.324	18.718	3.04e-12	*
134	Residual	134	5915.55	44.1459	NA	NA
135	Species	4	1610.34	402.586	27.594	1.03e-16	*
135	Tissue	1	380.371	380.371	26.0713	1.11e-06	*
135	Species:Tissue	4	1501.63	375.408	25.7311	7.87e-16	*
135	Residual	134	1955.01	14.5896	NA	NA
136	Species	4	1203.59	300.897	11.9068	2.63e-08	*
136	Tissue	1	714.804	714.804	28.2856	4.27e-07	*
136	Species:Tissue	4	1256.46	314.115	12.4299	1.26e-08	*
136	Residual	134	3386.31	25.271	NA	NA
137	Species	4	10638.1	2659.53	106.072	1.56e-40	*
137	Tissue	1	2097.66	2097.66	83.6626	8.41e-16	*
137	Species:Tissue	4	2629.02	657.254	26.2138	4.61e-16	*
137	Residual	134	3359.76	25.0729	NA	NA
138	Species	4	9708.26	2427.06	97.673	9.75e-39	*
138	Tissue	1	4247.88	4247.88	170.949	1.08e-25	*
138	Species:Tissue	4	2930.59	732.647	29.4841	1.38e-17	*
138	Residual	134	3329.75	24.8489	NA	NA
139	Species	4	352.12	88.0299	6.62817	6.74e-05	*
139	Tissue	1	93.1056	93.1056	7.01034	0.00907616	*
139	Species:Tissue	4	351.677	87.9193	6.61984	6.83e-05	*
139	Residual	134	1779.68	13.2812	NA	NA
140	Species	4	906.012	226.503	17.2193	2.03e-11	*
140	Tissue	1	245.669	245.669	18.6763	3e-05	*
140	Species:Tissue	4	969.851	242.463	18.4326	4.34e-12	*
140	Residual	134	1762.64	13.154	NA	NA
141	Species	4	16202.4	4050.59	128.269	8.23e-45	*
141	Tissue	1	201.575	201.575	6.38323	0.0126836	*
141	Species:Tissue	4	173.749	43.4372	1.37552	0.245766	*
141	Residual	134	4231.56	31.5788	NA	NA
142	Species	4	10883.2	2720.79	97.7547	9.35e-39	*
142	Tissue	1	3304.44	3304.44	118.725	3.44e-20	*
142	Species:Tissue	4	3451.21	862.803	30.9995	2.88e-18	*
142	Residual	134	3729.6	27.8328	NA	NA
144	Species	4	10184	2545.99	94.6324	4.66e-38	*
144	Tissue	1	250.957	250.957	9.32784	0.00272338	*
144	Species:Tissue	4	927.011	231.753	8.61405	3.23e-06	*
144	Residual	134	3605.14	26.904	NA	NA
145	Species	4	1540.87	385.219	14.8464	4.57e-10	*
145	Tissue	1	686.533	686.533	26.4591	9.35e-07	*
145	Species:Tissue	4	1423.68	355.919	13.7172	2.11e-09	*
145	Residual	134	3476.9	25.947	NA	NA
146	Species	4	2108.06	527.014	37.956	3.32e-21	*
146	Tissue	1	497.934	497.934	35.8616	1.84e-08	*
146	Species:Tissue	4	1965.74	491.436	35.3936	3.71e-20	*
146	Residual	134	1860.58	13.8849	NA	NA
147	Species	4	684.189	171.047	3.4134	0.0108077	*
147	Tissue	1	14.581	14.581	0.290975	0.590491
147	Species:Tissue	4	1785.69	446.424	8.90877	2.07e-06	*
147	Residual	134	6714.82	50.1106	NA	NA
148	Species	4	349.313	87.3283	6.6291	6.73e-05	*
148	Tissue	1	92.3635	92.3635	7.01132	0.00907143	*
148	Species:Tissue	4	348.874	87.2186	6.62077	6.82e-05	*
148	Residual	134	1765.25	13.1735	NA	NA
149	Species	4	10015.1	2503.77	87.8365	1.76e-36	*
149	Tissue	1	3181.81	3181.81	111.623	2.36e-19	*
149	Species:Tissue	4	5074.92	1268.73	44.5091	9.95e-24	*
149	Residual	134	3819.66	28.5049	NA	NA
150	Species	4	11787.3	2946.81	111.701	1.11e-41	*
150	Tissue	1	482.996	482.996	18.3083	3.55e-05	*
150	Species:Tissue	4	365.296	91.3239	3.46169	0.0100106	*
150	Residual	134	3535.09	26.3813	NA	NA
151	Species	4	1594.78	398.696	18.2583	5.41e-12	*
151	Tissue	1	426.185	426.185	19.5171	2.04e-05	*
151	Species:Tissue	4	1173.81	293.452	13.4387	3.09e-09	*
151	Residual	134	2926.08	21.8364	NA	NA
152	Species	4	8413.45	2103.36	79.7565	1.73e-34	*
152	Tissue	1	5211.76	5211.76	197.622	3.81e-28	*
152	Species:Tissue	4	4176.29	1044.07	39.5897	7.43e-22	*
152	Residual	134	3533.89	26.3723	NA	NA
153	Species	4	263.899	65.9747	2.01928	0.0952699	*
153	Tissue	1	393.557	393.557	12.0456	0.000699	*
153	Species:Tissue	4	256.322	64.0804	1.9613	0.104006	*
153	Residual	134	4378.1	32.6724	NA	NA
154	Species	4	220.271	55.0676	4.82148	0.00115311	*
154	Tissue	1	58.2427	58.2427	5.09948	0.0255494	*
154	Species:Tissue	4	219.994	54.9984	4.81542	0.00116424	*
154	Residual	134	1530.46	11.4213	NA	NA
155	Species	4	6339.39	1584.85	111834	5.59e-235	*
155	Tissue	1	4272.31	4272.31	301473	1.7e-226	*
155	Species:Tissue	4	6113.77	1528.44	107854	6.33e-234	*
155	Residual	134	1.89897	0.0141714	NA	NA
156	Species	4	10776.4	2694.1	119.777	3.01e-43	*
156	Tissue	1	4237.07	4237.07	188.377	2.56e-27	*
156	Species:Tissue	4	3955.96	988.991	43.9697	1.58e-23	*
156	Residual	134	3014	22.4926	NA	NA
157	Species	4	1063.66	265.916	5.83724	0.00023187	*
157	Tissue	1	1905.71	1905.71	41.8331	1.71e-09	*
157	Species:Tissue	4	1369.12	342.28	7.51355	1.72e-05	*
157	Residual	134	6104.38	45.5551	NA	NA
160	Species	4	862.375	215.594	15.1428	3.07e-10	*
160	Tissue	1	228.024	228.024	16.0159	0.00010343	*
160	Species:Tissue	4	861.291	215.323	15.1238	3.15e-10	*
160	Residual	134	1907.81	14.2374	NA	NA
162	Species	4	139.249	34.8122	3.31316	0.0126692	*
162	Tissue	1	36.8194	36.8194	3.50419	0.0633936
162	Species:Tissue	4	139.074	34.7684	3.30899	0.012753	*
162	Residual	134	1407.97	10.5072	NA	NA
163	Species	4	1123.63	280.908	19.8438	7.53e-13	*
163	Tissue	1	297.105	297.105	20.9879	1.05e-05	*
163	Species:Tissue	4	1122.22	280.555	19.8189	7.77e-13	*
163	Residual	134	1896.9	14.156	NA	NA
164	Species	4	16525.9	4131.47	833.703	1.38e-93	*
164	Tissue	1	1465.51	1465.51	295.73	1.02e-35	*
164	Species:Tissue	4	3743.22	935.804	188.839	4.91e-54	*
164	Residual	134	664.046	4.95557	NA	NA
165	Species	4	376.116	94.029	3.3258	0.0124179	*
165	Tissue	1	301.417	301.417	10.6611	0.00138905	*
165	Species:Tissue	4	373.449	93.3623	3.30222	0.0128906	*
165	Residual	134	3788.53	28.2726	NA	NA
166	Species	4	2273.87	568.467	37.0739	7.54e-21	*
166	Tissue	1	509.38	509.38	33.2204	5.4e-08	*
166	Species:Tissue	4	2501.2	625.299	40.7803	2.55e-22	*
166	Residual	134	2054.67	15.3334	NA	NA
167	Species	4	206.352	51.588	1.29624	0.274722
167	Tissue	1	8.04457	8.04457	0.202135	0.65373
167	Species:Tissue	4	842.982	210.746	5.29537	0.00054451	*
167	Residual	134	5332.94	39.7981	NA	NA
168	Species	4	433.481	108.37	2.56278	0.0412628	*
168	Tissue	1	4.87761	4.87761	0.115347	0.734668	*
168	Species:Tissue	4	1308.13	327.033	7.73378	1.23e-05	*
168	Residual	134	5666.36	42.2863	NA	NA
169	Species	4	17.7755	4.44386	1.1614	0.330766
169	Tissue	1	5.23934	5.23934	1.3693	0.244009
169	Species:Tissue	4	24.3408	6.08519	1.59037	0.180479
169	Residual	134	512.722	3.82628	NA	NA
170	Species	4	244.345	61.0863	4.82144	0.00115318	*
170	Tissue	1	64.6084	64.6084	5.09943	0.0255501	*
170	Species:Tissue	4	244.038	61.0096	4.81538	0.00116432	*
170	Residual	134	1697.74	12.6697	NA	NA
171	Species	4	98.6249	24.6562	1.54852	0.191802
171	Tissue	1	66.3344	66.3344	4.16609	0.0432042
171	Species:Tissue	4	94.905	23.7262	1.49011	0.208689
171	Residual	134	2133.61	15.9225	NA	NA
172	Species	4	445.96	111.49	2.80716	0.028153	*
172	Tissue	1	684.966	684.966	17.2464	5.81e-05	*
172	Species:Tissue	4	441.674	110.418	2.78018	0.0293707	*
172	Residual	134	5321.99	39.7163	NA	NA
173	Species	4	623.525	155.881	5.49413	0.00039788	*
173	Tissue	1	353.045	353.045	12.4433	0.00057506	*
173	Species:Tissue	4	617.675	154.419	5.44259	0.00043158	*
173	Residual	134	3801.89	28.3723	NA	NA
aPeak number assigned to peaks identified from GC-MS
b Component
c Degrees of freedom
d Sum of Squares
e Mean Squares
f F value
g Probability of F value
h Significance determined if Pr(>F) was less than 0.05
