# Supplementary material for: Distinct terpene metabolite blends serve as core drivers of consumer aroma preferences in fir Christmas tree species
Source: Research Square preprint supplement (doi:10.21203/rs.3.rs-5760578/v1), 2025-04-21
Supplement: Supplementary file 5 [file 44e5584333f5f0a36c63bcb0.xlsx]

## Sheet: Sheet1
Table S3. Mono/sesqui-terpene pairwise comparisons for significant compounds from repeated measures ANOVA.
Peaka	Comparisonb	Estimatec	SEd	dfe	t ratiof	p valueg
Stem 44	Time1-Time2	0	1.45	70	0	1
	Time1-Time3	-4.28	1.45	70	-2.958	0.0332
	Time1-Time4	0	1.45	70	0	1
	Time1-Time5	0	1.45	70	0	1
	Time2-Time3	-4.28	1.45	70	-2.958	0.0332
	Time2-Time4	0	1.45	70	0	1
	Time2-Time5	0	1.45	70	0	1
	Time3-Time4	4.28	1.45	70	2.958	0.0332
	Time3-Time5	4.28	1.45	70	2.958	0.0332
	Time4-Time5	0	1.45	70	0	1
Stem 83	Time1-Time2	-4.17	2.03	70	-2.049	0.2539
	Time1-Time3	-4.34	2.03	70	-2.133	0.2179
	Time1-Time4	0	2.03	70	0	1
	Time1-Time5	0	2.03	70	0	1
	Time2-Time3	-0.17	2.03	70	-0.084	1
	Time2-Time4	4.17	2.03	70	2.049	0.2539
	Time2-Time5	4.17	2.03	70	2.049	0.2539
	Time3-Time4	4.34	2.03	70	2.133	0.2179
	Time3-Time5	4.34	2.03	70	2.133	0.2179
	Time4-Time5	0	2.03	70	0	1
Stem 119	Time1-Time2	0	2	70	0	1
	Time1-Time3	0	2	70	0	1
	Time1-Time4	-4.1752	2	70	-2.086	0.2378
	Time1-Time5	-4.199	2	70	-2.098	0.2327
	Time2-Time3	0	2	70	0	1
	Time2-Time4	-4.1752	2	70	-2.086	0.2378
	Time2-Time5	-4.199	2	70	-2.098	0.2327
	Time3-Time4	-4.1752	2	70	-2.086	0.2378
	Time3-Time5	-4.199	2	70	-2.098	0.2327
	Time4-Time5	-0.0239	2	70	-0.012	1
Stem 125	Time1-Time2	3.971	3.15	70	1.261	0.7155
	Time1-Time3	-8.051	3.15	70	-2.557	0.0898
	Time1-Time4	5.387	3.15	70	1.711	0.434
	Time1-Time5	-7.086	3.15	70	-2.251	0.1736
	Time2-Time3	-12.022	3.15	70	-3.818	0.0026
	Time2-Time4	1.416	3.15	70	0.45	0.9914
	Time2-Time5	-11.057	3.15	70	-3.512	0.0068
	Time3-Time4	13.438	3.15	70	4.268	0.0006
	Time3-Time5	0.965	3.15	70	0.306	0.998
	Time4-Time5	-12.473	3.15	70	-3.962	0.0016
Needle 80	Time1 - Time2	0	2.46	70	0	1
	Time1 - Time3	-2.8847	2.46	70	-1.173	0.7665
	Time1 - Time4	-2.8322	2.46	70	-1.152	0.7783
	Time1 - Time5	-8.3757	2.46	70	-3.407	0.0094
	Time2 - Time3	-2.8847	2.46	70	-1.173	0.7665
	Time2 - Time4	-2.8322	2.46	70	-1.152	0.7783
	Time2 - Time5	-8.3757	2.46	70	-3.407	0.0094
	Time3 - Time4	0.0525	2.46	70	0.021	1
	Time3 - Time5	-5.491	2.46	70	-2.233	0.1797
	Time4 - Time5	-5.5435	2.46	70	-2.255	0.1723
a Peak number assigned to peaks identified from GC-MS
b Pairwise comparison
c Estimate of term
d Standard error
e Degrees of freedom
f t ratio
g p value
