# Supplementary material for: Distinct terpene metabolite blends serve as core drivers of consumer aroma preferences in fir Christmas tree species
Source: Research Square preprint supplement (doi:10.21203/rs.3.rs-5760578/v1), 2025-04-21
Supplement: Supplementary file 6 [file 764ee5dfadddda8e708c2e4b.xlsx]

## Sheet: Sheet1
Table S8. Diterpene pairwise comparisons for significant compounds from repeated measures ANOVA.
Peaka	Comparisonb	Estimatec	SEd	dfe	t ratiof	p valueg
Stem Peak 168	Time1-Time2	7.85	2.33	69	3.365	0.0107
	Time1-Time3	4.46	2.37	69	1.876	0.3396
	Time1-Time4	7.85	2.33	69	3.365	0.0107
	Time1-Time5	7.85	2.33	69	3.365	0.0107
	Time2-Time3	-3.39	2.37	69	-1.43	0.6109
	Time2-Time4	0	2.33	69	0	1
	Time2-Time5	0	2.33	69	0	1
	Time3-Time4	3.39	2.37	69	1.43	0.6109
	Time3-Time5	3.39	2.37	69	1.43	0.6109
	Time4-Time5	0	2.33	69	0	1
Needle Peak 154	Time1-Time2	0	1.86	65	0	1
	Time1-Time3	-1.53	1.86	65	-0.821	0.9231
	Time1-Time4	0	1.98	65	0	1
	Time1-Time5	-5.26	1.93	65	-2.722	0.0615
	Time2-Time4	0	1.98	65	0	1
	Time2-Time5	-5.26	1.93	65	-2.722	1
	Time3-Time4	1.53	1.98	65	0.774	0.9371
	Time3-Time5	-3.73	1.93	65	-1.931	0.3118
	Time4-Time5	-5.26	2.04	65	-2.577	0.0867
Needle Peak 170	Time1-Time2	0	1.96	65	0	1
	Time1-Time3	0	1.96	65	0	1
	Time1-Time4	-1.97	2.07	65	-0.952	0.8751
	Time1-Time5	-5.58	2.03	65	-2.75	0.0575
	Time2-Time3	0	1.96	65	0	1
	Time2-Time4	-1.97	2.07	65	-0.952	0.8751
	Time2-Time5	-5.58	2.03	65	-2.75	0.0575
	Time3-Time4	-1.97	2.07	65	-0.952	0.8751
	Time3-Time5	-5.58	2.03	65	-2.75	0.575
	Time4-Time5	-3.6	2.14	65	-1.681	0.4524
Needle Peak .172	Time1-Time2	1.143	3.28	65	0.348	0.9968
	Time1-Time3	4.55	3.28	65	1.386	0.639
	Time1-Time4	0.548	3.48	65	0.157	0.9999
	Time1-Time5	-6.7	3.41	65	-1.966	0.294
	Time2-Time3	-3.407	3.28	65	1.038	0.837
	Time2-Time4	-0.595	3.48	65	-0.171	0.9998
	Time2-Time5	-7.843	3.41	65	-2.302	0.1576
	Time3-Time4	-4.001	3.48	65	-1.149	0.7799
	Time3-Time5	-11.249	3.41	65	-3.301	0.0131
	Time4-Time5	-7.248	3.6	65	-2.013	0.2712
a Peak number assigned to peaks identified from GC-MS
b Pairwise of comparison
c Estimate
d Standard error
e Degrees of freedom
f t ratio
g p value where significant values are less than 0.05
