# Supplementary material for: Distinct terpene metabolite blends serve as core drivers of consumer aroma preferences in fir Christmas tree species
Source: Research Square preprint supplement (doi:10.21203/rs.3.rs-5760578/v1), 2025-04-21
Supplement: Supplementary file 7 [file 78d763d217714c57c6113d39.xlsx]

## Sheet: Sheet1
Table S1. List of monoterpenes and sesquiterpenes identified via GC-MS analysis from samples collected October 2021 from Concolor fir, Fraser fir, noble fir, Nordmann fir, and Trojan fir for aroma evaluation.
Peak Numbera	Species peak detected inb	Tissuec	RTd	Ione	Daughter Ionf	Putative IDg	Matchh
1	C, F, N, Nord, T,	N, S	7.1	136.1	121.1,105.1,93.1,77.1,65.2,53,41.1	α-Pinene*	95
2	C, F, Nord	N, S	7.29	136.1	121.1, 107.1,93.1,79.1,67.1,41.1	Camphene*	90
3	C, F, N, Nord, T	N, S	7.64	121.1	93.1,79.1,69.1,41.1	𝛽-Pinene*	96
4	F, N, Nord, T	N, S	7.68	93.1	69.1,53.1,41.1	𝛽-Myrcene	80
5	C, F, N, Nord, T	N, S	8.27	136.1	93.1,91.1,79.1,77.1,68.1,41.1	Limonene*	97
6	N, T	N	8.53	134.1	91.1,85.1,55,41.1	Artemsia Alcohol	95
7	F	N	8.56	121.1	93.1,41.1,69.1,91.1,79.1	(-)-Isopinocampheol	74
8	T	S	8.56	134	91,92,93,77	α-Phellandrene*	82
9	C, F, N, Nord, T	N, S	8.56	136.1	121,91.1,92.1,93.1,77	γ-Terpinene	93
10	C, F, N, Nord	N, S	8.75	121	111,93,91,77	cis-Sabinene Hydrate	92
11	T	N	8.77	93.1	82,67,55.1,43.1	Limonene Oxide	73
12	C, F, N, Nord, T,	N, S	8.89	136.1	121.1,93.1,71.1,58.1,43.1	Terpinolene*	98
13	N	S	8.99	93.1	80,71,57,41.1	Ethylinalool	74
14	C, F, Nord, T	N, S	8.99	121.1	93.1,80.1,71.1,55.1,41.1	Linalool*	99
15	N	S	8.99	93.1	80.1,71.1,55.0,43.0	Linalyl Acetate	77
16	N	N, S	9.08	121	111,93,78.9,71.1,65	cis Sabinene Hydrate	88
17	C	N, S	9.31	136.1	121.1,105.1,81.1,41.1	trans-Allocimene	97
18	C, F, N, Nord	N, S	9.44	137.1	119,109.1,91.1,91.1,82.1,67.1,43.1	Limonene Oxide	87
19	C, F, N	N, S	9.58	121.1	111.1,95.1,84.1,69.1,55.1,41.1	Citronellal	99
20	C, F	N, S	9.64	121.1	95.1,84.1,69.1,55.1,41.1	(+)-2-Bornanone	93
21	C, F	N, S	9.64	152.1	108.1,99.1,95.1,81.1,55.1,41.1	Camphor	92
22	C, F	N, S	9.73	111.1	96.1,86.1,71.1,55.1,43.1	Camphene Hydrate	90
23	C, F, Nord, T	N, S	9.89	123.1	109,95.1,67,55.1,41.1	endo-Borneol	90
24	C, F, N, Nord, T	N, S	9.95	111.1	93.1,86.1,77,71.1,55.1,43.1	(-)Terpinen-4-ol	89
25	C, F, N, Nord, T	N, S	10.1	136.1	121.1,93.1,81.1,67.1,59.1,43.1	α-Terpineol	96
26	Nord, T	S	10.1	108.1	91.1,79.1,67.1,55.1,41.1	(-)-Myrtenol*	88
27	F, N, Nord, T	N, S	10.3	150	135,107.1,91,80.1,41.1	δ-Verbenone	80
28	C, N	N, S	10.3	95.1	82.1,69.1,55.1,41.1	Citronellol*	92
29	C	N	10.5	119.1	109.1,94.1,84.1,81,69,56.9,51.1	Neral	84
30	C, N	N, S	10.6	123.1	93.1,84.1,69.1,53,41.1	Geraniol*	88
31	T	N	10.6	121.1	93,80.1,69.1,43	Linalyl Acetate	94
32	F	N	10.7	150	107,91,79,68.1,55.1,41	δ-Verbenone	76
33	C, F, N, Nord	N, S	10.7	110	95,82,67,54,41.1	Piperitone	88
34	C, F, N	N, S	10.8	137.1	109.1,94.1,84.1,69.1,53.1,41.1	α-Citral	91
35	N	N	10.8	110	95.1,81,66.9,54.1,43.1	(+)-Nopinone	76
36	C	N	10.8	136.1	121.1,107.1,93,81.1,67.1,54.1,43.1	p-Menth-8-en-3-ol, acetate	83
37	C	N	10.9	136.1	121.1,71,55,43	Neodihydrocarveol	80
38	C, F, N, Nord, T	N, S	11	136.1	121.1,108.1,95.1,80.1,67.11,43.1	Bornyl Acetate*	99
39	C	N, S	11.3	153.1	109.1,81.1,67.1,43.1	(+)-Isosylvestrene	74
40	T	N	11.3	134.1	119,105,93,79,43	Isoledene	75
41	C, N, Nord, T	N, S	11.4	136.1	121.1,107.9,93,71.1,43.1	γ-Terpineol	89
42	C	N, S	11.4	109.1	93,81.1,69.1,57,43.1	Plinol D	76
43	T	N	11.5	161.1	136.1,121.1,105,91,76.9,55	δ-Elemene	86
44	C	S	11.5	121.1	95.1,81.1,69.1,55.1,43.1	Farnesol	84
45	C	N, S	11.5	123.1	95.1,81.1,69.1,55.1,43.1	Citronellol acetate	94
46	N	N, S	11.5	161.1	136.1,121.1,105.1,93.1,77.1,41.1	δ-Elemene	89
47	T	N	11.5	136.1	121.1,93.1,79.1,67.1,43.1	α-Terpinyl Acetate	96
48	F	N	11.5	134.1	121.1,106,93.1,79.1,43.1	Carene	78
49	C	N	11.7	119.1	107,91,82,51.1	(E)-8-hydroxylinalool	86
50	C, N	N, S	11.8	136.1	121.1,93.1,80.1,69.1,53.1,41.1	Geranyl Acetate	90
51	C, N, Nord	N, S	11.6	204.2	161.1,119.1,105.1,91.1,81.1,41.1	α-Cubebene	98
52	N	N, S	11.7	161.1	136.2,121.1,105,94,77,67.1,41	Copaene	80
53	Nord	N, S	11.7	133	119.1,105,93.1,77.1,41	α-Longipinene	95
54	F, N, Nord	N, S	11.8	161.2	119.1,105,93.1,69.1,41	Ylangene	83
55	F	S	11.9	204.2	133.1,105,94.1,79	Longicyclene	80
56	C, N, Nord, T	N, S	11.9	161.1	119.1,105.1,93.1,81.1,41.1	Copaene	90
57	C	N, S	12	161.1	120.1,105.1,91.1,81.1,41.1	𝛽-Copaene	97
58	N, Nord, T	N, S	12	121.1	107.1,93.1,81.1,67.1,53.1,41.1	𝛽-Elemene	98
59	N, T	N	12.1	126	81.1,68,55.1,41.1	𝛽-Springene	85
60	F, Nord, T	N, S	12.1	161.1	133.1,119.1,108.1,93.1,79.1	Sativene	85
61	N, Nord, T	N, S	12.2	204.1	189.2,161.1,133,119.1,105,91.1,77.1	γ-Muurolene	94
62	F, N	N, S	12.2	204.2	161.1,133.1,119,105.1,91,81.1,41.1	Aromadendrene	92
63	Nord, T	N	12.2	204.2	189.1,161.1,133.1,119.1,105,91.1,79.1,41.1	Isoledene	95
64	N	N, S	12.2	119	105,93.1,69.1,55.1,41	Unknown	81
65	N	N	12.3	204.2	189.1,161.1,147.1,133.1,119.1,105.1,91.1,43.2	(-)-Aristolene	94
66	F, Nord	N, S	12.3	161.1	133.1,105.1,91.1,79.1,41.1	Longifolene	98
67	C, F, N, Nord, T	N, S	12.3	133.1	105.1,93.1,79.1,69.1,41.1	𝛽-Caryophyllene*	99
68	C	S	12.4	161.1	133,119.1,105.1,91.1,79,41.1	𝛽-Copaene	96
69	N, T	N, S	12.4	147.1	133.1,105,93.1,79.1,41.1	α-Guaiene	97
70	C, F, Nord, T	N, S	12.5	133.1	120.1,93.1,79.1,69.1,55.1,41.1	(E)-𝛽-Farnesene	92
71	F, T	N	12.5	154	133.1,93.1,79.1,69.1,55,41.1	Unknown	77
72	C	N, S	12.6	204.2	161.1,119.1,105.1,91.1,41.1	Cadina-3,5-diene	96
73	N, N	N, S	12.7	204.2	161.2,133.1,121.1,105.1,93.1,80.1,41.1	Alloaromadendrene	93
74	Nord, T	N, S	12.7	147.1	121.1,107.1,93.1,80.1,41.1	Humulene*	97
75	N	N, S	12.7	204.2	189.2,161.1,133.1,119.1,105.1,91.1,81.1	𝛽-Cadinene	91
76	C, F, N	N, S	12.8	162.1	133.1,119.1,105,91.1,79,69.1,41	Unknown	95
77	F	N, S	12.8	133.1	120.1,107,93.1,77,69.1,55.1,41.1	(E)-𝛽-Farnesene	95
78	N	N, S	12.8	204.2	161.1,133.1,119.1,105.1,91.1,79.1,41.1	Isoledene	96
79	C, N	N, S	12.9	161.1	119.1,105.1,91.1,81,55,41.1	𝛽-Copaene-4a-ol	92
80	C, N	N, S	12.9	119.1	107.1,93.1,69.2,55.1,41.1	α-Farnesene	88
81	T	N, S	12.9	204.2	189.2,147.1,133.1,105.1,91.1,79.1	4a,8-Dimethyl-2-(prop-1-en-2-yl)-1,2,3,4,4a,5,6,7-octahydronaphthalene	97
82	F, Nord	N, S	12.9	161.1	133.1,119.1,105.1,93.1,79.1,41.1	Aromadendrene	96
83	C, N	N, S	12.9	204.2	189.2,161.1,133.1,119.1,105.1,91.1,77.1,41.1	𝛽-Cadinene	95
84	C	S	12.9	119.1	107.1,93.1,79.1,55.1,41.1	cis-α-Bisabolene	90
85	N, Nord, T	N, S	12.9	204.2	121.1,105.1,93.1,79.1,67.1,41.1	𝛽-Selinene	98
86	Nord	N, S	12.9	204.2	189.2,161.1,147.1,133.1,119.1,1051,91.1	Valerena-4,7(11)-diene	97
87	C	N, S	13	204.2	161.1,119.1,105.1,91.1,41.1	α-Muurolene	95
88	C	N, S	13	204.2	161.1,119.1,105.1,91.1,41.1	α-Muurolene	94
89	F	N, S	13	109.1	93.1,79.1,69.1,41.1	𝛽-Bisabolene	99
90	N	N, S	13	204.2	121.1,105.1,93.1,79.1,67.1,41.1	𝛽-Selinene	96
91	C, F, Nord	N, S	13	204.1	119.1,107.1,93.1,79.1,41.1	cis-γ-Bisabolene	95
92	T	N, S	13	189.2	151.1,147.1,333.1,105.1,91.1,79.1,41.1	Cadinadiene-1,4	97
93	N, Nord	N, S	13.1	204.2	161.1,121,107.1,91.1,78.9	Gemacrene	83
94	C, Nord, T	N, S	13.1	207.2	161.1,119.1,105.1,91.1,43.1	Cubebol	97
95	F	N, S	13.1	161.1	109.1,93.1,77.1,69.1,55.1,41.1	𝛽-Sesquiphellandrene	92
96	N	N, S	13.1	204.2	161.1,134.1,119.1	(+) δ Cadinene	96
97	N, T	N, S	13.2	204.2	161.1,134.1,122.1,91.1,81.2,65,41	(-)-α-Panasinsen	93
98	Nord	N	13.2	207.2	133,119,91.1,69.2,55,41.1	Zingiberenol	83
99	N	S	13.2	134	119.9,107,94.1,83	α-Maaliene	78
100	Nord	N	13.3	119.1	105.1,91.1,55.1,43.1	𝛽-Acorenol	93
101	F, N	N, S	13.3	121.1	109.1,93.1,80.1,41.1	α-Bisabolene	94
102	C, N	N, S	13.3	204.2	161.1,119.1,105.1,91.1,41.1	Cadine-1,4-diene	95
103	F, Nord	N, S	13.3	168	126.1,98,69,55,41	Piperitone	84
104	C, F, Nord	N, S	13.4	107.1	93.1,81.1,69.1,55.1,41.1	Nerolidol*	87
105	C, F, N, T	N, S	13.4	161.1	107.1,93.1,81.1,69.1,59.1,41.1	Elemol	95
106	C, N, T	N, S	13.5	204.2	189.2,161.1,133.1,119.1,105.1,91,41	𝛽-Maaliene	87
107	C, N, T	N, S	13.7	161.1	119.1,105.1,91,81.1,55.1,43.1	Epicubebol	93
108	C	N, S	13.7	161.1	123.1,105.1,93.1,81.1,43.1	Gleenol	79
109	N, T	N, S	13.9	138.1	109.1,96,81.1,67.1,55.1,43	(-)-Humulene	82
110	Nord	N	13.9	189.2	109.1,85.1,69.1,41.1	Longiborneol	97
111	C, N, Nord, T	N, S	14	204.2	161.1,119.1,105.1,93.1,81.1,43.1	Epicubebol	93
112	F	N	14	136.1	121,109.1,95.1,81.1,43.1	Isolongifolol	72
113	Nord	N	14.1	151.1	133.1,93.1,81.1,67.1,43.1	Widrol	88
114	C, N, T	N, S	14.1	204.2	161.1,119.1,105.1,81.1,55.1,41.1	α-Amorphene	94
115	F	S	14.1	202.2	134.1,119.1,107.1,91.1,79.1	4-epi-α-Acoradiene	82
116	N, N, Nord	N, S	14.1	204.1	189.2,161.1,137.1,107.1,9.1	γ-Eudesmol	76
117	F, Nord, T	N, S	14.1	182.1	137.1,122,107.1,91.1,77.1	Dihydroconiferol	96
118	C, N	N, S	14.2	204.2	161.1,121.1,109.1,95.1,69.1,43.1	tau-Muurolol	85
119	C	S	14.3	220.2	177.1,159.1,131.1,105.1,91.1,67.1	Hydroxy-α-Muurolene	85
120	C, N	N, S	14.3	189.1	161.1,149.1,109.1,93.1,81.1,59.1,43.1	α-Eudesmol	95
121	F, Nord	N, S	14.3	119.1	109.1,93.1,79.1,55.1,41.1	7-epi-cis-sesquisabinene hydrate	95
122	T	N, S	14.4	204.2	189.2,161.1,125.1,95.1,81.1,67.1,43.1	(+) Maaliol	95
123	F, N	N, S	14.4	119.1	109.1,93,69.1,58.1,43.1	α-Bisabolol*	92
124	Nord	N	14.4	109.1	84.1,69.1,55.1,41.1	Shyobunol	89
125	C, F, N, T	S	14.6	109.1	97.1,83,71.1,55,41.1	(Z)-6,7-Dihydrofarnesol	81
126	C, F, N, Nord, T	N, S	14.6	107.1	81.1,69.1,55,41.1	Farnesol	93
127	C, T	N, S	14.6	222.1	204.1,189.2,161.2,135.1,105,81,43	Juniper camphor	91
128	N	S	14.8	136	91,84.1,69.1,55.1,41.1	trans,trans-Farnesal	91
129	N	N	15.2	162.1	147.1,134.1,119,93.1,79.1,43	Isospathulenol	76
130	T	N	15.5	149.1	123.1,109.1,95.1,82.1,68,55.1,43.1	Virdiflorol	80
131	C, N, Nord	N, S	15.5	136.1	93.1,69.1,55.1,41.1	trans, trans-Farnesyl Acetate	91
132	F	S	15.8	137.1	95.1,82,67,55.1,43.1	cis-8-Hydroxylinalool	76
a Number corresponding to a single individual peak identified using GC-MS.
b Species each compound was identified in. Where C is Concolor fir, F is Fraser fir, N is Noble fir, Nord is Nordmann fir, T is Trojan fir.
c Tissue type compound present in where N is needle and S is stem
d Retention time for all individual biological replicates for each compound from all species
e The dominant molecular ion [M-H]- detected via GC-MS
f Fragmentation of the dominant ion.
g Putative compound identity assigned based on NIST database match to mass spectra
h Match Factor indicating similarity of compound to library match.
* Indicates compound was confirmed with a standard
