# Supplementary material for: Distinct terpene metabolite blends serve as core drivers of consumer aroma preferences in fir Christmas tree species
Source: Research Square preprint supplement (doi:10.21203/rs.3.rs-5760578/v1), 2025-04-21
Supplement: Supplementary file 8 [file 8562749f7017f1aa15642399.xlsx]

## Sheet: Sheet1
Table S6. List of diterpenes identified by GC-MS from samples collected in October 2021 from Concolor fir, Fraser fir, Noble fir, Nordmann fir, and Trojan fir for aroma evaluation.
Peak Numbera	Species peak detected inb	Tissuec	RTd	Ione	Daughter Ionf	Putative IDg	Matchh
133	Nord, T	N, S	16.6	257	137,91,41	8(14),15-Sandaracopimaradiene	82
134	C, F, Nord, T	N, S	16.8	275.1	257.2,192.1,137.1,95.1,81.1,55.1	Manoyl Oxide	90
135	F	N	16.8	313.2	257.2,133.1,109.1,81.1,41.1	Thunbergene	75
136	C, Nord	N	16.8	275.3	257.3,192.1,137.1,95.1,81.1,67.1,43.1	Isopimara-9(11),15-diene	84
137	F, Nord, T,	N, S	16.9	272.3	257.2,143.1,117.1,91,41.1	Palustradiene	83
138	C, F, N, Nord, T	N, S	17	272.2	137.1,92.1,43	Levopimaradiene	86
139	C	S	17	275.3	257.2,192.1,137.95.1,81.1,43.1	Manoyl Oxide	93
140	N	S	17.1	107.1	93.1,81.1,67.1,55.1	Thunbergol	89
141	C, F, N	N, S	17.1	137.1	95.1,69,55.1,41.1	Epimanool	92
142	F, Nord, T	N, S	17.4	272.3	229.2,136.1,105.1,81.1,43	7,13-Abietadiene	86
143	C, F, T	N, S	17.5	195.2	177.2,121.1,95.1,69.1,43.1	cis-Abienol*	81
144	C, Nord, T	N, S	17.8	272.3	135.1,119.1,91.1,69.1,41.1	Neoabietadiene	80
145	C, F	S	17.8	284.2	192.1,146.1,117.1,91.1	Unknown diterpene #1	73
146	F	S	17.9	339.2	134.1,81.1,43.1	Sclareol	75
147	C, F, Nord, T	N, S	18	286.2	243.2,149.1,123,91.1,	Sandaracompimarinal	77
148	C	N	18	301.2	257.2,241.2,123.1,91	Methyl Abietate	71
149	F, N, Nord, T	N, S	18.3	286.3	271.2,105.1,91.1	Palustrinal	90
150	C, F	N, S	18.3	286.2	133.1,91.1,43.1	Levopimarinal	77
151	Nord, T	N, S	18.3	316.2	257,180,133,121,105,79	Methyl Sandaracopimarate	79
152	Nord, T	N, S	18.4	316.2	180.1,121.1,105.1,79.1	Methyl Sandaracopimarate	90
153	F, N, T	N, S	18.5	284.1	269.2,185.1,173.1,159.1	Dehydroabietal	81
154	C	S	18.5	270.2	239.2,173.1,85.1,57.1	Methyl Abietate	72
155	C, N	N	18.6	316	301, 241, 185	Methyl 8,15-Pimaradien-18-oate	78
156	C, F, N, Nord, T	N, S	18.7	316	146,121,91,43	Methyl Levopimarate	83
157	F, N, Nord, T	N, S	18.8	286.2	255.2,187.1,163,131,109.2,81.1,43	Unknown diterpene #2	78
158	C, F, N, Nord, T	N, S	18.9	314.2	239.2,197,141	Methyl Dehydroabietate	97
159	F, N	S	18.9	314.2	253.2,239.2,211.1,143.1,91.1	Methyl Dehydroabietate	60
160	C	S	19	316.3	256.2,213.2,185.1,121.1,91.1	Dehydroabietinol	76
161	C, F, N, Nord, T	N, S	19.1	316.3	256.2,213.2,185.1,121.1,91.1	Abietic acid*	94
162	T	S	19.3	288.2	255.2,207,187.2,136.1,114.8	Abietinol	76
163	CS	S	19.3	314.3	299.2,239.2,131.1,129.1	Methyl Dehydroabietate	72
164	C, F, Nord, T	N, S	19.4	316.3	148.1,135.1,121.1,91.1	Methyl Neoabietate	89
165	N, Nord, T	N, S	19.7	332.3	255.2,239.2,165.1,131.1,109.1	Methyl 7,13,15-abietatrienoate	73
166	Nord, T	N	19.7	361	332,254,121,91,59	Kaur-16-en-18-oic acid, 13-hydroxy-, methyl ester, (4.α.)-(.+/-.)-	77
167	C, F, N, Nord	N, S	19.8	245	147,123,107,93,81,55	Unknown diterpene #3	71
168	C, F, N, Nord	N, S	20.1	348.2	289.2,273.1,165.1,43.1	Unknown diterpene #4	74
169	Nord	S	20.2	340	317,254,121,91,43	Unknown diterpene #5	53
170	C	S	20.3	245.2	123.1,91.1,55.1,43.1	Unknown diterpene #6	73
171	C, F	S	22.2	255.2	148.1,115,91.1,55.1	Retinol	78
172	F, N	S	22.4	268.2	253.2,211.1,173.2,115,55	Dehydroabietol cinnimate	73
173	F, T	S	22.9	270	255,187,131,115,55	Neoabietyl Acetate	78
a Number corresponding to a single individual peak identified using GC-MS.
b Species each compound was identified in. Where C is Concolor fir, F is Fraser fir, N is Noble fir, Nord is Nordmann fir, T is Trojan fir.
c Tissue type compound present in where N is needle and S is stem
d Retention time for all individual biological replicates for each compound from all species
e The dominant molecular ion [M-H]- detected via GC-MS
f Fragmentation of the dominant ion.
g Putative compound identity assigned based on NIST database match to mass spectra
h Match Factor indicating similarity of compound to library match.
