# Supplementary material for: Distinct terpene metabolite blends serve as core drivers of consumer aroma preferences in fir Christmas tree species
Source: Research Square preprint supplement (doi:10.21203/rs.3.rs-5760578/v1), 2025-04-21
Supplement: Supplementary file 9 [file cba0fe241e3f041784c31fd1.xlsx]

## Sheet: Sheet1
Table S5. Two-way ANOVA for each monoterpene and sesquiterpene peak between species and tissue type.
Peaka	Componentb	DFc	Sum Sqd	Mean Sqe	F valuef	Pr(>F)g	Significanceh
1	Species	4	50.9164	12.7291	214.229	1.29e-58	*
1	Tissue	1	4.87492	4.87492	82.0441	1.04e-15	*
1	Species:Tissue	4	28.1724	7.04309	118.534	6.18e-44	*
1	Residuals	140	8.31855	0.0594182	NA	NA
2	Species	4	10875.6	2718.9	278.881	1.29e-65	*
2	Tissue	1	4698.46	4698.46	481.926	3.55e-47	*
2	Species:Tissue	4	4748.41	1187.1	121.763	1.45e-44	*
2	Residuals	140	1364.91	9.74933	NA	NA
3	Species	4	222.871	55.7177	477.361	1.72e-80	*
3	Tissue	1	0.0841548	0.0841548	0.720996	0.397267
3	Species:Tissue	4	28.8616	7.2154	61.8179	5.34e-30	*
3	Residuals	140	16.3408	0.11672	NA	NA
4	Species	4	10878.4	2719.6	68.2679	6.05e-32	*
4	Tissue	1	1606.92	1606.92	40.3371	2.79e-09	*
4	Species:Tissue	4	2803.49	700.872	17.5934	1.02e-11	*
4	Residuals	140	5577.21	39.8372	NA	NA
IS	Species	4	0.215254	0.0538134	1.44386	0.222732
IS	Tissue	1	0.024105	0.024105	0.646755	0.422639
IS	Species:Tissue	4	0.179196	0.0447991	1.20199	0.312732
IS	Residuals	140	5.21789	0.0372707	NA	NA
5	Species	4	94.4523	23.6131	704.335	1.25e-91	*
5	Tissue	1	3.3705	3.3705	100.536	3.63e-18	*
5	Species:Tissue	4	5.41616	1.35404	40.3886	1.81e-22	*
5	Residuals	140	4.69355	0.0335253	NA	NA
6	Species	4	1832.63	458.157	22.0288	4.04e-14	*
6	Tissue	1	1195.38	1195.38	57.4756	4.29e-12	*
6	Species:Tissue	4	1832.63	458.157	22.0288	4.04e-14	*
6	Residuals	140	2911.73	20.798	NA	NA
7	Species	4	1485.73	371.432	38.4941	1.05e-21	*
7	Tissue	1	371.432	371.432	38.4941	5.83e-09	*
7	Species:Tissue	4	1485.73	371.432	38.4941	1.05e-21	*
7	Residuals	140	1350.87	9.64906	NA	NA
8	Species	4	688.63	172.157	15.997	8.27e-11	*
8	Tissue	1	172.157	172.157	15.997	0.000102	*
8	Species:Tissue	4	688.63	172.157	15.997	8.27e-11	*
8	Residuals	140	1506.66	10.7619	NA	NA
9	Species	4	5388.4	1347.1	24.0767	3.6e-15	*
9	Tissue	1	457.142	457.142	8.17047	0.004909	*
9	Species:Tissue	4	2490.16	622.539	11.1266	7.26e-08	*
9	Residuals	140	7833.06	55.9505	NA	NA
10	Species	4	6949.45	1737.36	36.0172	1.13e-20	*
10	Tissue	1	11.1929	11.1929	0.232039	0.630768
10	Species:Tissue	4	626.523	156.631	3.2471	0.013944	*
10	Residuals	140	6753.19	48.2371	NA	NA
11	Species	4	1528.66	382.164	55.9776	4.01e-28	*
11	Tissue	1	382.164	382.164	55.9776	7.37e-12	*
11	Species:Tissue	4	1528.66	382.164	55.9776	4.01e-28	*
11	Residuals	140	955.791	6.82708	NA	NA
12	Species	4	35.5792	8.89479	174.264	2.57e-53	*
12	Tissue	1	1.12899	1.12899	22.1188	6.08e-06	*
12	Species:Tissue	4	11.6321	2.90803	56.9731	1.89e-28	*
12	Residuals	140	7.1459	0.0510422	NA	NA
13	Species	4	79.7615	19.9404	2.20061	0.071993
13	Tissue	1	0.00366695	0.00366695	0.000405	0.983979
13	Species:Tissue	4	22.5946	5.64866	0.623385	0.646578
13	Residuals	140	1268.58	9.06128	NA	NA
14	Species	4	4531.39	1132.85	31.3784	1.19e-18	*
14	Tissue	1	72.0039	72.0039	1.99441	0.160099
14	Species:Tissue	4	4736.19	1184.05	32.7965	2.77e-19	*
14	Residuals	140	5054.4	36.1028	NA	NA
15	Species	4	39.6419	9.91047	2.15369	0.077371
15	Tissue	1	9.91047	9.91047	2.15369	0.144471
15	Species:Tissue	4	39.6419	9.91047	2.15369	0.077371
15	Residuals	140	644.228	4.60163	NA	NA
16	Species	4	2633.49	658.372	46.9482	5.63e-25	*
16	Tissue	1	185.408	185.408	13.2214	0.000388	*
16	Species:Tissue	4	741.633	185.408	13.2214	3.66e-09	*
16	Residuals	140	1963.27	14.0234	NA	NA
17	Species	4	11358.9	2839.72	155332	3.47e-254	*
17	Tissue	1	4.19009	4.19009	229.197	2.82e-31	*
17	Species:Tissue	4	16.7604	4.19009	229.197	2.19e-60	*
17	Residuals	140	2.55942	0.0182816	NA	NA
18	Species	4	5489.42	1372.36	38.8278	7.71e-22	*
18	Tissue	1	7.77014	7.77014	0.219839	0.639892
18	Species:Tissue	4	1505.32	376.331	10.6475	1.46e-07	*
18	Residuals	140	4948.25	35.3447	NA	NA
19	Species	4	11023.6	2755.91	197.68	1.56e-56	*
19	Tissue	1	203.849	203.849	14.622	0.000197	*
19	Species:Tissue	4	223.43	55.8575	4.00664	0.004153	*
19	Residuals	140	1951.77	13.9412	NA	NA
20	Species	4	2330.39	582.596	16.6419	3.52e-11	*
20	Tissue	1	11.8957	11.8957	0.339802	0.560881
20	Species:Tissue	4	41.6945	10.4236	0.297751	0.879019
20	Residuals	140	4901.1	35.0078	NA	NA
21	Species	4	925.307	231.327	8.05688	7.1e-06	*
21	Tissue	1	2.93665	2.93665	0.102281	0.749586
21	Species:Tissue	4	314.448	78.6119	2.73798	0.031194	*
21	Residuals	140	4019.64	28.7117	NA	NA
22	Species	4	11454.1	2863.52	309.35	2e-68	*
22	Tissue	1	977.282	977.282	105.577	8.38e-19	*
22	Species:Tissue	4	1994.02	498.506	53.8543	2.07e-27	*
22	Residuals	140	1295.92	9.25657	NA	NA
23	Species	4	5978.96	1494.74	74.4614	1.06e-33	*
23	Tissue	1	4022.14	4022.14	200.365	8.59e-29	*
23	Species:Tissue	4	2618.06	654.515	32.6051	3.37e-19	*
23	Residuals	140	2810.36	20.074	NA	NA
24	Species	4	4671.75	1167.94	53.6113	2.5e-27	*
24	Tissue	1	355.07	355.07	16.2986	8.87e-05	*
24	Species:Tissue	4	6078.99	1519.75	69.7603	2.23e-32	*
24	Residuals	140	3049.94	21.7853	NA	NA
25	Species	4	862.338	215.584	5.47045	0.000402	*
25	Tissue	1	1047.47	1047.47	26.5796	8.46e-07	*
25	Species:Tissue	4	7182.29	1795.57	45.5626	1.84e-24	*
25	Residuals	140	5517.24	39.4089	NA	NA
26	Species	4	1078.6	269.651	8.86715	2.07e-06	*
26	Tissue	1	440.783	440.783	14.4946	0.00021	*
26	Species:Tissue	4	981.872	245.468	8.07192	6.93e-06	*
26	Residuals	140	4257.42	30.4101	NA	NA
27	Species	4	590.993	147.748	4.20708	0.003015	*
27	Tissue	1	362.83	362.83	10.3315	0.001624	*
27	Species:Tissue	4	2039.7	509.925	14.5199	6.07e-10	*
27	Residuals	140	4916.66	35.119	NA	NA
28	Species	4	15534.2	3883.54	799.325	2.66e-95	*
28	Tissue	1	49.5621	49.5621	10.2011	0.001734	*
28	Species:Tissue	4	89.1333	22.2833	4.58643	0.001645	*
28	Residuals	140	680.194	4.85853	NA	NA
29	Species	4	1131.39	282.847	38.4494	1.1e-21	*
29	Tissue	1	282.847	282.847	38.4494	5.94e-09	*
29	Species:Tissue	4	1131.39	282.847	38.4494	1.1e-21	*
29	Residuals	140	1029.89	7.35633	NA	NA
30	Species	4	8003.14	2000.78	75.6977	4.83e-34	*
30	Tissue	1	64.1237	64.1237	2.42606	0.12159
30	Species:Tissue	4	102.182	25.5455	0.96649	0.428004
30	Residuals	140	3700.37	26.4312	NA	NA
31	Species	4	494.339	123.585	12.2471	1.45e-08	*
31	Tissue	1	123.585	123.585	12.2471	0.000625	*
31	Species:Tissue	4	494.339	123.585	12.2471	1.45e-08	*
31	Residuals	140	1412.73	10.0909	NA	NA
32	Species	4	1167.02	291.755	38.4946	1.05e-21	*
32	Tissue	1	291.755	291.755	38.4946	5.83e-09	*
32	Species:Tissue	4	1167.02	291.755	38.4946	1.05e-21	*
32	Residuals	140	1061.08	7.57911	NA	NA
33	Species	4	10177.8	2544.45	137.361	1.94e-47	*
33	Tissue	1	124.96	124.96	6.74588	0.0104	*
33	Species:Tissue	4	309.527	77.3817	4.17739	0.003161	*
33	Residuals	140	2593.35	18.5239	NA	NA
34	Species	4	6683.07	1670.77	55.4269	6.12e-28	*
34	Tissue	1	887.57	887.57	29.4447	2.46e-07	*
34	Species:Tissue	4	968.808	242.202	8.03493	7.34e-06	*
34	Residuals	140	4220.11	30.1436	NA	NA
35	Species	4	1211.45	302.861	38.4678	1.08e-21	*
35	Tissue	1	302.861	302.861	38.4678	5.9e-09	*
35	Species:Tissue	4	1211.45	302.861	38.4678	1.08e-21	*
35	Residuals	140	1102.24	7.87311	NA	NA
36	Species	4	2624.3	656.075	71687.3	1.1e-230	*
36	Tissue	1	656.075	656.075	71687.3	1.31e-191	*
36	Species:Tissue	4	2624.3	656.075	71687.3	1.1e-230	*
36	Residuals	140	1.28127	0.0091519	NA	NA
37	Species	4	664.654	166.164	15.9966	8.28e-11	*
37	Tissue	1	166.164	166.164	15.9966	0.000102	*
37	Species:Tissue	4	664.654	166.164	15.9966	8.28e-11	*
37	Residuals	140	1454.24	10.3874	NA	NA
38	Species	4	1698.52	424.63	23.9234	4.3e-15	*
38	Tissue	1	1237.3	1237.3	69.7083	5.99e-14	*
38	Species:Tissue	4	432.081	108.02	6.08579	0.000152	*
38	Residuals	140	2484.95	17.7496	NA	NA
39	Species	4	8418.65	2104.66	390.697	7.28e-75	*
39	Tissue	1	1.05775	1.05775	0.196354	0.658364	*
39	Species:Tissue	4	4.231	1.05775	0.196354	0.939944	*
39	Residuals	140	754.173	5.38695	NA	NA
40	Species	4	1139.27	284.816	17.7645	8.15e-12	*
40	Tissue	1	204.84	204.84	12.7762	0.000482	*
40	Species:Tissue	4	808.012	202.003	12.5993	8.78e-09	*
40	Residuals	140	2244.6	16.0329	NA	NA
41	Species	4	6097.36	1524.34	130.733	2.99e-46	*
41	Tissue	1	3805.54	3805.54	326.378	2.1e-38	*
41	Species:Tissue	4	2777.5	694.375	59.5523	2.77e-29	*
41	Residuals	140	1632.39	11.6599	NA	NA
42	Species	4	2766.94	691.734	38.4599	1.09e-21	*
42	Tissue	1	13.4197	13.4197	0.746123	0.389184	*
42	Species:Tissue	4	124.793	31.1983	1.7346	0.145715	*
42	Residuals	140	2518.02	17.9859	NA	NA
43	Species	4	2204.58	551.146	57304.8	6.98e-224	*
43	Tissue	1	551.146	551.146	57304.8	8.13e-185	*
43	Species:Tissue	4	2204.58	551.146	57304.8	6.98e-224	*
43	Residuals	140	1.34649	0.0096178	NA	NA
44	Species	4	109.79	27.4474	3.49994	0.009325	*
44	Tissue	1	27.4474	27.4474	3.49994	0.063458	*
44	Species:Tissue	4	109.79	27.4474	3.49994	0.009325	*
44	Residuals	140	1097.91	7.84224	NA	NA
45	Species	4	9719.88	2429.97	323.738	1.14e-69	*
45	Tissue	1	68.971	68.971	9.18881	0.002902	*
45	Species:Tissue	4	275.884	68.971	9.18881	1.27e-06	*
45	Residuals	140	1050.84	7.50598	NA	NA
46	Species	4	14114.1	3528.53	1466.41	3.72e-113	*
46	Tissue	1	1.79526	1.79526	0.746089	0.389195
46	Species:Tissue	4	10.3917	2.59794	1.07967	0.368983
46	Residuals	140	336.873	2.40623	NA	NA
47	Species	4	2561.24	640.311	423413	1.15e-284	*
47	Tissue	1	640.311	640.311	423413	1.49e-245	*
47	Species:Tissue	4	2561.24	640.311	423413	1.15e-284	*
47	Residuals	140	0.211717	0.00151226	NA	NA
48	Species	4	2890.61	722.652	121.534	1.6e-44	*
48	Tissue	1	1854.73	1854.73	311.925	1.91e-37	*
48	Species:Tissue	4	2890.61	722.652	121.534	1.6e-44	*
48	Residuals	140	832.451	5.94608	NA	NA
49	Species	4	10896.9	2724.24	174.643	2.26e-53	*
49	Tissue	1	259.032	259.032	16.6058	7.67e-05	*
49	Species:Tissue	4	716.393	179.098	11.4815	4.34e-08	*
49	Residuals	140	2183.85	15.5989	NA	NA
50	Species	4	1217.09	304.274	25.421	7.68e-16	*
50	Tissue	1	513.395	513.395	42.8923	1.02e-09	*
50	Species:Tissue	4	1217.09	304.274	25.421	7.68e-16	*
50	Residuals	140	1675.72	11.9694	NA	NA
51	Species	4	5327.71	1331.93	52.7066	5.09e-27	*
51	Tissue	1	119.702	119.702	4.7368	0.031201	*
51	Species:Tissue	4	1479.02	369.754	14.6318	5.21e-10	*
51	Residuals	140	3537.88	25.2706	NA	NA
52	Species	4	13546.4	3386.61	511.084	1.99e-82	*
52	Tissue	1	98.496	98.496	14.8643	0.000175	*
52	Species:Tissue	4	675.11	168.777	25.4707	7.26e-16	*
52	Residuals	140	927.685	6.62632	NA	NA
53	Species	4	7877.9	1969.48	128.162	8.9e-46	*
53	Tissue	1	654.393	654.393	42.5841	1.15e-09	*
53	Species:Tissue	4	1102.94	275.736	17.9433	6.47e-12	*
53	Residuals	140	2151.39	15.3671	NA	NA
54	Species	4	6811.96	1702.99	107.869	9.34e-42	*
54	Tissue	1	38.1146	38.1146	2.41422	0.122495
54	Species:Tissue	4	5290.46	1322.61	83.7759	3.6e-36	*
54	Residuals	140	2210.25	15.7875	NA	NA
55	Species	4	1508.16	377.041	55.9601	4.07e-28	*
55	Tissue	1	377.041	377.041	55.9601	7.42e-12	*
55	Species:Tissue	4	1508.16	377.041	55.9601	4.07e-28	*
55	Residuals	140	943.274	6.73767	NA	NA
56	Species	4	9921.81	2480.45	87.0513	5.42e-37	*
56	Tissue	1	793.659	793.659	27.8534	4.87e-07	*
56	Species:Tissue	4	532.283	133.071	4.67011	0.001439	*
56	Residuals	140	3989.18	28.4942	NA	NA
57	Species	4	6523.89	1630.97	124.98	3.52e-45	*
57	Tissue	1	228.339	228.339	17.4974	5.05e-05	*
57	Species:Tissue	4	913.356	228.339	17.4974	1.15e-11	*
57	Residuals	140	1826.99	13.0499	NA	NA
58	Species	4	15797.8	3949.45	463.804	1.12e-79	*
58	Tissue	1	48.5422	48.5422	5.70056	0.018295	*
58	Species:Tissue	4	371.729	92.9322	10.9135	9.89e-08	*
58	Residuals	140	1192.15	8.51534	NA	NA
59	Species	4	1304.61	326.154	18.1367	5.05e-12	*
59	Tissue	1	694.903	694.903	38.642	5.5e-09	*
59	Species:Tissue	4	1304.61	326.154	18.1367	5.05e-12	*
59	Residuals	140	2517.63	17.9831	NA	NA
60	Species	4	6607.38	1651.84	136.862	2.38e-47	*
60	Tissue	1	130.237	130.237	10.7907	0.001289	*
60	Species:Tissue	4	3232.81	808.204	66.9631	1.46e-31	*
60	Residuals	140	1689.71	12.0694	NA	NA
61	Species	4	4722.95	1180.74	23.6236	6.1e-15	*
61	Tissue	1	1.75977	1.75977	0.035209	0.851431
61	Species:Tissue	4	405.935	101.484	2.03043	0.093397
61	Residuals	140	6997.38	49.9813	NA	NA
62	Species	4	962.569	240.642	10.7084	1.34e-07	*
62	Tissue	1	289.924	289.924	12.9014	0.000454	*
62	Species:Tissue	4	918.678	229.67	10.2201	2.74e-07	*
63	Residuals	140	3146.12	22.4723	NA	NA
63	Species	4	1732.33	433.082	18.0986	5.3e-12	*
63	Tissue	1	1098.48	1098.48	45.9058	3.17e-10	*
63	Species:Tissue	4	1958.02	489.506	20.4566	2.73e-13	*
63	Residuals	140	3350.07	23.929	NA	NA
64	Species	4	7019.21	1754.8	251.776	7.12e-63	*
64	Tissue	1	1.00021	1.00021	0.143508	0.705392
64	Species:Tissue	4	4.00085	1.00021	0.143508	0.965592
64	Residuals	140	975.759	6.96971	NA	NA
65	Species	4	3075.8	768.951	260.56	8.65e-64	*
65	Tissue	1	590.337	590.337	200.036	9.19e-29	*
65	Species:Tissue	4	2361.35	590.337	200.036	7.72e-57	*
65	Residuals	140	413.161	2.95115	NA	NA
66	Species	4	10898.4	2724.61	440.623	3.13e-78	*
66	Tissue	1	412.534	412.534	66.7149	1.66e-13	*
66	Species:Tissue	4	2959.96	739.99	119.671	3.7e-44	*
66	Residuals	140	865.696	6.18354	NA	NA
67	Species	4	65.8814	16.4703	238.223	2.09e-61	*
67	Tissue	1	30.9172	30.9172	447.179	2e-45	*
67	Species:Tissue	4	4.40366	1.10091	15.9234	9.12e-11	*
67	Residuals	140	9.67935	0.0691382	NA	NA
68	Species	4	1201.75	300.438	38.0667	1.58e-21	*
68	Tissue	1	300.438	300.438	38.0667	6.93e-09	*
68	Species:Tissue	4	1201.75	300.438	38.0667	1.58e-21	*
68	Residuals	140	1104.94	7.8924	NA	NA
69	Species	4	9866.36	2466.59	1070.47	7.48e-104	*
69	Tissue	1	707.331	707.331	306.975	4.14e-37	*
69	Species:Tissue	4	2351.53	587.883	255.135	3.15e-63	*
69	Residuals	140	322.588	2.3042	NA	NA
70	Species	4	6567.44	1641.86	56.3012	3.14e-28	*
70	Tissue	1	265.153	265.153	9.09238	0.003049	*
70	Species:Tissue	4	4684.36	1171.09	40.158	2.24e-22	*
70	Residuals	140	4082.69	29.1621	NA	NA
71	Species	4	2905.77	726.442	68.7172	4.47e-32	*
71	Tissue	1	3.78892	3.78892	0.35841	0.550358
71	Species:Tissue	4	4832.84	1208.21	114.29	4.36e-43	*
71	Residuals	140	1480.01	10.5715	NA	NA
72	Species	4	10501.2	2625.29	816.588	6.34e-96	*
72	Tissue	1	1.28004	1.28004	0.398153	0.529074	*
72	Species:Tissue	4	5.12016	1.28004	0.398153	0.809712	*
72	Residuals	140	450.093	3.21495	NA	NA
73	Species	4	11582.4	2895.61	376506	4.26e-281	*
73	Tissue	1	0.160532	0.160532	20.8734	1.07e-05	*
73	Species:Tissue	4	0.642126	0.160532	20.8734	1.64e-13	*
73	Residuals	140	1.0767	0.00769073	NA	NA
74	Species	4	11861.5	2965.38	55828.5	4.33e-223	*
74	Tissue	1	27.2977	27.2977	513.928	1.05e-48	*
74	Species:Tissue	4	9.35817	2.33954	44.046	6.84e-24	*
74	Residuals	140	7.43622	0.0531158	NA	NA
75	Species	4	9387.44	2346.86	825.403	3.08e-96	*
75	Tissue	1	1.71286	1.71286	0.602422	0.438965
75	Species:Tissue	4	6.85144	1.71286	0.602422	0.661513
75	Residuals	140	398.06	2.84329	NA	NA
76	Species	4	4344.54	1086.13	25.0358	1.19e-15	*
76	Tissue	1	404.62	404.62	9.32663	0.002704	*
76	Species:Tissue	4	6044.71	1511.18	34.8332	3.6e-20	*
76	Residuals	140	6073.66	43.3833	NA	NA
77	Species	4	8710.99	2177.75	412.007	2.39e-76	*
77	Tissue	1	8.38886	8.38886	1.58708	0.209839
77	Species:Tissue	4	33.5555	8.38886	1.58708	0.181059
77	Residuals	140	739.999	5.28571	NA	NA
78	Species	4	10908.3	2727.07	843.052	7.45e-97	*
78	Tissue	1	3.82788	3.82788	1.18336	0.278542
78	Species:Tissue	4	15.3115	3.82788	1.18336	0.320809
78	Residuals	140	452.866	3.23476	NA	NA
79	Species	4	7512.92	1878.23	58.9955	4.17e-29	*
79	Tissue	1	455.648	455.648	14.312	0.000229	*
79	Species:Tissue	4	683.593	170.898	5.36794	0.000474	*
79	Residuals	140	4457.16	31.8368	NA	NA
80	Species	4	347.696	86.9241	3.48379	0.009568	*
80	Tissue	1	241.919	241.919	9.69576	0.00224	*
80	Species:Tissue	4	465.496	116.374	4.6641	0.001453	*
80	Residuals	140	3493.14	24.951	NA	NA
81	Species	4	12369	3092.26	283842	1.65e-272	*
81	Tissue	1	5.04853	5.04853	463.411	2.95e-46	*
81	Species:Tissue	4	20.1941	5.04853	463.411	1.19e-79	*
81	Residuals	140	1.5252	0.0108943	NA	NA
82	Species	4	9809.68	2452.42	1071.48	7.02e-104	*
82	Tissue	1	390.851	390.851	170.766	5.18e-26	*
82	Species:Tissue	4	3345.83	836.458	365.456	5.22e-73	*
82	Residuals	140	320.433	2.28881	NA	NA
83	Species	4	2661.86	665.465	18.2855	4.17e-12	*
83	Tissue	1	267.88	267.88	7.36074	0.007504	*
83	Species:Tissue	4	477.343	119.336	3.27908	0.013254	*
83	Residuals	140	5095.03	36.3931	NA	NA
84	Species	4	866.823	216.706	20.9953	1.41e-13	*
84	Tissue	1	216.706	216.706	20.9953	1.01e-05	*
84	Species:Tissue	4	866.823	216.706	20.9953	1.41e-13	*
84	Residuals	140	1445.03	10.3216	NA	NA
85	Species	4	15869.9	3967.47	787.797	7.03e-95	*
85	Tissue	1	131.317	131.317	26.0748	1.05e-06	*
85	Species:Tissue	4	216.557	54.1393	10.7501	1.26e-07	*
85	Residuals	140	705.062	5.03616	NA	NA
86	Species	4	5394.37	1348.59	158.131	6.93e-51	*
86	Tissue	1	452.615	452.615	53.072	2.14e-11	*
86	Species:Tissue	4	1810.46	452.615	53.072	3.81e-27	*
86	Residuals	140	1193.96	8.52832	NA	NA
87	Species	4	3302.27	825.569	36.0736	1.07e-20	*
87	Tissue	1	184.978	184.978	8.08272	0.005138	*
87	Species:Tissue	4	739.913	184.978	8.08272	6.82e-06	*
87	Residuals	140	3203.99	22.8857	NA	NA
88	Species	4	3233.72	808.429	35.379	2.1e-20	*
88	Tissue	1	168.908	168.908	7.39184	0.007381	*
88	Species:Tissue	4	675.63	168.908	7.39184	1.98e-05	*
88	Residuals	140	3199.08	22.8506	NA	NA
89	Species	4	12415.9	3103.97	518.187	8.07e-83	*
89	Tissue	1	8.86661	8.86661	1.48022	0.225787
89	Species:Tissue	4	22.1802	5.54506	0.92571	0.450943
89	Residuals	140	838.609	5.99006	NA	NA
90	Species	4	11384.5	2846.13	340.994	4.28e-71	*
90	Tissue	1	71.8397	71.8397	8.6071	0.003914	*
90	Species:Tissue	4	317.815	79.4539	9.51935	7.76e-07	*
90	Residuals	140	1168.52	8.34656	NA	NA
91	Species	4	3345.24	836.309	64.8834	6.13e-31	*
91	Tissue	1	28.5566	28.5566	2.21551	0.138879
91	Species:Tissue	4	7010.48	1752.62	135.974	3.41e-47	*
91	Residuals	140	1804.52	12.8894	NA	NA
92	Species	4	10917.5	2729.36	926.266	1.32e-99	*
92	Tissue	1	18.0198	18.0198	6.1154	0.014598	*
92	Species:Tissue	4	72.0793	18.0198	6.1154	0.000145	*
92	Residuals	140	412.528	2.94663	NA	NA
93	Species	4	1490.23	372.557	30.1344	4.38e-18	*
93	Tissue	1	214.409	214.409	17.3425	5.43e-05	*
93	Species:Tissue	4	1911.96	477.989	38.6623	9e-22	*
93	Residuals	140	1730.85	12.3632	NA	NA
94	Species	4	12311.6	3077.89	183.182	1.39e-54	*
94	Tissue	1	1556.42	1556.42	92.6311	3.85e-17	*
94	Species:Tissue	4	2314.54	578.635	34.4377	5.32e-20	*
94	Residuals	140	2352.33	16.8024	NA	NA
95	Species	4	6005.13	1501.28	123.706	6.14e-45	*
95	Tissue	1	36.6138	36.6138	3.01699	0.084596	*
95	Species:Tissue	4	146.455	36.6138	3.01699	0.020086	*
95	Residuals	140	1699.02	12.1359	NA	NA
96	Species	4	9880.53	2470.13	95.2029	6.01e-39	*
96	Tissue	1	145.281	145.281	5.59938	0.019337	*
96	Species:Tissue	4	225.59	56.3974	2.17365	0.075038	*
96	Residuals	140	3632.44	25.946	NA	NA
97	Species	4	6463.4	1615.85	80.1643	3.08e-35	*
97	Tissue	1	13.033	13.033	0.646583	0.4227
97	Species:Tissue	4	353.876	88.469	4.38906	0.002254	*
97	Residuals	140	2821.94	20.1567	NA	NA
98	Species	4	2349.66	587.415	199498	8.61e-262	*
98	Tissue	1	587.415	587.415	199498	1.1e-222	*
98	Species:Tissue	4	2349.66	587.415	199498	8.61e-262	*
98	Residuals	140	0.412225	0.00294447	NA	NA
99	Species	4	542.567	135.642	8.00669	7.66e-06	*
99	Tissue	1	30.3577	30.3577	1.79196	0.182857
99	Species:Tissue	4	435.056	108.764	6.42014	8.99e-05	*
99	Residuals	140	2371.75	16.941	NA	NA
100	Species	4	2885.17	721.292	150011	3.98e-253	*
100	Tissue	1	721.292	721.292	150011	5.01e-214	*
100	Species:Tissue	4	2885.17	721.292	150011	3.98e-253	*
100	Residuals	140	0.673155	0.00480825	NA	NA
101	Species	4	11510.4	2877.6	186.582	4.73e-55	*
101	Tissue	1	1.0116	1.0116	0.065591	0.798243
101	Species:Tissue	4	152.883	38.2207	2.47821	0.046844	*
101	Residuals	140	2159.18	15.4227	NA	NA
102	Species	4	10000.5	2500.12	174.738	2.19e-53	*
102	Tissue	1	48.8475	48.8475	3.41404	0.066755
102	Species:Tissue	4	159.796	39.949	2.7921	0.028648	*
102	Residuals	140	2003.1	14.3078	NA	NA
103	Species	4	6396.62	1599.16	107.159	1.32e-41	*
103	Tissue	1	53.2166	53.2166	3.56602	0.061042
103	Species:Tissue	4	1232.87	308.219	20.6536	2.14e-13	*
103	Residuals	140	2089.25	14.9232	NA	NA
104	Species	4	2678.79	669.697	21.9182	4.61e-14	*
104	Tissue	1	6.91276	6.91276	0.226244	0.635064
104	Species:Tissue	4	4193.56	1048.39	34.3122	6.03e-20	*
104	Residuals	140	4277.62	30.5544	NA	NA
105	Species	4	9841.76	2460.44	98.7823	9.09e-40	*
105	Tissue	1	251.355	251.355	10.0915	0.001833	*
105	Species:Tissue	4	3040.71	760.177	30.5197	2.92e-18	*
105	Residuals	140	3487.08	24.9077	NA	NA
106	Species	4	8807.33	2201.83	68.4985	5.18e-32	*
106	Tissue	1	75.1331	75.1331	2.33737	0.128559
106	Species:Tissue	4	771.528	192.882	6.00052	0.000174	*
106	Residuals	140	4500.19	32.1442	NA	NA
107	Species	4	16029.5	4007.37	579.99	4.9e-86	*
107	Tissue	1	27.5988	27.5988	3.9944	0.047588	*
107	Species:Tissue	4	94.7008	23.6752	3.42653	0.010482	*
107	Residuals	140	967.313	6.90938	NA	NA
108	Species	4	7778.86	1944.72	293.165	5.77e-67	*
108	Tissue	1	31.5404	31.5404	4.7547	0.030889	*
108	Species:Tissue	4	126.162	31.5404	4.7547	0.001257	*
108	Residuals	140	928.694	6.63353	NA	NA
109	Species	4	3554.73	888.682	78.0126	1.15e-34	*
109	Tissue	1	17.5454	17.5454	1.54021	0.216662
109	Species:Tissue	4	3765.17	941.292	82.6309	7.06e-36	*
109	Residuals	140	1594.81	11.3915	NA	NA
110	Species	4	2805.03	701.258	134383	8.79e-250	*
110	Tissue	1	701.258	701.258	134383	1.1e-210	*
110	Species:Tissue	4	2805.03	701.258	134383	8.79e-250	*
110	Residuals	140	0.73057	0.00521836	NA	NA
111	Species	4	12735.2	3183.81	99.0641	7.85e-40	*
111	Tissue	1	187.939	187.939	5.8477	0.016883
111	Species:Tissue	4	346.475	86.6188	2.69514	0.033365	*
111	Residuals	140	4499.45	32.1389	NA	NA
112	Species	4	1804.38	451.096	195.382	3.12e-56	*
112	Tissue	1	451.096	451.096	195.382	2.42e-28	*
112	Species:Tissue	4	1804.38	451.096	195.382	3.12e-56	*
112	Residuals	140	323.231	2.30879	NA	NA
113	Species	4	2890.63	722.658	193380	7.61e-261	*
113	Tissue	1	722.658	722.658	193380	9.69e-222	*
113	Species:Tissue	4	2890.63	722.658	193380	7.61e-261	*
113	Residuals	140	0.523177	0.00373698	NA	NA
114	Species	4	14511.6	3627.9	431.924	1.14e-77	*
114	Tissue	1	624.612	624.612	74.3639	1.26e-14	*
114	Species:Tissue	4	1741.41	435.353	51.8315	1.02e-26	*
114	Residuals	140	1175.92	8.3994	NA	NA
115	Species	4	1655.53	413.883	55.9495	4.1e-28	*
115	Tissue	1	413.883	413.883	55.9495	7.44e-12	*
115	Species:Tissue	4	1655.53	413.883	55.9495	4.1e-28	*
115	Residuals	140	1035.64	7.39743	NA	NA
116	Species	4	9603.31	2400.83	258.228	1.5e-63	*
116	Tissue	1	663.466	663.466	71.3611	3.43e-14	*
116	Species:Tissue	4	2480.11	620.027	66.6888	1.77e-31	*
116	Residuals	140	1301.62	9.29731	NA	NA
117	Species	4	2901.52	725.381	31.5947	9.51e-19	*
117	Tissue	1	1.58267	1.58267	0.068935	0.79328
117	Species:Tissue	4	4897.52	1224.38	53.3291	3.12e-27	*
117	Residuals	140	3214.25	22.959	NA	NA
118	Species	4	7082.82	1770.7	111.234	1.84e-42	*
118	Tissue	1	75.9513	75.9513	4.77119	0.030604	*
118	Species:Tissue	4	185.956	46.4889	2.92039	0.023401	*
118	Residuals	140	2228.62	15.9187	NA	NA
119	Species	4	420.764	105.191	9.33313	1.02e-06	*
119	Tissue	1	105.191	105.191	9.33313	0.002695	*
119	Species:Tissue	4	420.764	105.191	9.33313	1.02e-06	*
119	Residuals	140	1577.9	11.2707	NA	NA
120	Species	4	9352.47	2338.12	82.9651	5.79e-36	*
120	Tissue	1	733.332	733.332	26.0213	1.08e-06	*
120	Species:Tissue	4	2122.31	530.576	18.8268	2.09e-12	*
120	Residuals	140	3945.47	28.182	NA	NA
121	Species	4	2477.92	619.481	46.5031	8.22e-25	*
121	Tissue	1	86.9076	86.9076	6.52396	0.011713	*
121	Species:Tissue	4	3898.12	974.53	73.1558	2.43e-33	*
121	Residuals	140	1864.98	13.3213	NA	NA
122	Species	4	14344.7	3586.18	472543	5.28e-288	*
122	Tissue	1	4.81735	4.81735	634.772	7.2e-54	*
122	Species:Tissue	4	19.2694	4.81735	634.772	1.25e-88	*
122	Residuals	140	1.06247	0.0075891	NA	NA
123	Species	4	14166.9	3541.72	326.922	6.16e-70	*
123	Tissue	1	0.0498365	0.0498365	0.0046	0.946022
123	Species:Tissue	4	6.46716	1.61679	0.149239	0.963072
123	Residuals	140	1516.7	10.8335	NA	NA
124	Species	4	2220.55	555.139	195.53	2.98e-56	*
124	Tissue	1	555.139	555.139	195.53	2.35e-28	*
124	Species:Tissue	4	2220.55	555.139	195.53	2.98e-56	*
124	Residuals	140	397.481	2.83915	NA	NA
125	Species	4	1414.32	353.58	10.5944	1.58e-07	*
125	Tissue	1	3103.07	3103.07	92.9774	3.47e-17	*
125	Species:Tissue	4	1414.32	353.58	10.5944	1.58e-07	*
125	Residuals	140	4672.42	33.3744	NA	NA
126	Species	4	3870.4	967.599	41.9084	4.56e-23	*
126	Tissue	1	5981.02	5981.02	259.048	1.2e-33	*
126	Species:Tissue	4	2314.75	578.688	25.064	1.15e-15	*
126	Residuals	140	3232.38	23.0884	NA	NA
127	Species	4	6181.74	1545.43	73.4618	2e-33	*
127	Tissue	1	240.257	240.257	11.4205	0.000941	*
127	Species:Tissue	4	1065.26	266.316	12.6593	8.06e-09	*
127	Residuals	140	2945.21	21.0372	NA	NA
128	Species	4	2623.03	655.758	17836.1	1.93e-188	*
128	Tissue	1	655.758	655.758	17836.1	1.7e-149	*
128	Species:Tissue	4	2623.03	655.758	17836.1	1.93e-188	*
128	Residuals	140	5.14722	0.0367659	NA	NA
129	Species	4	783.74	195.935	20.9857	1.43e-13	*
129	Tissue	1	195.935	195.935	20.9857	1.01e-05	*
129	Species:Tissue	4	783.74	195.935	20.9857	1.43e-13	*
129	Residuals	140	1307.13	9.33661	NA	NA
130	Species	4	1364.95	341.238	26.8985	1.46e-16	*
130	Tissue	1	234.567	234.567	18.49	3.18e-05	*
130	Species:Tissue	4	938.267	234.567	18.49	3.21e-12	*
130	Residuals	140	1776.06	12.6862	NA	NA
131	Species	4	7153.84	1788.46	70.0718	1.82e-32	*
131	Tissue	1	1055.76	1055.76	41.3645	1.86e-09	*
131	Species:Tissue	4	1106.41	276.603	10.8373	1.11e-07	*
131	Residuals	140	3573.26	25.5233	NA	NA
132	Species	4	776.317	194.079	20.9915	1.42e-13	*
132	Tissue	1	194.079	194.079	20.9915	1.01e-05	*
132	Species:Tissue	4	776.317	194.079	20.9915	1.42e-13	*
132	Residuals	140	1294.38	9.2456	NA	NA
a Peak number assigned to peaks identified from GC-MS
b Pairwise of comparison
c Estimate
d Standard error
e Degrees of freedom
f t ratio
g p values
h Significance. Significant p-values had an α of < 0.05.
