# Supplementary material for: Distinct terpene metabolite blends serve as core drivers of consumer aroma preferences in fir Christmas tree species
Source: Research Square preprint supplement (doi:10.21203/rs.3.rs-5760578/v1), 2025-04-21
Supplement: Supplementary file 10 [file d7565e0f5b932598cd6d6d42.xlsx]

## Sheet: Sheet1
Table S7. Repeated measures ANOVA for each diterpene compound normalized abundance level over time.
Peaka	DFb	Sum Sqc	Mean Sqd	F valuee	Pr(>F)f	Significanceg
Stem Tissue
133	4	267.229	66.8074	1.11558	0.356299
133	69	4132.12	59.8859	NA	NA
134	4	117.497	29.3743	0.378395	0.82332
134	69	5356.38	77.6287	NA	NA
135	4	2e-26	4.99e-27	0.982384	0.422984
135	69	3.51e-25	5.08e-27	NA	NA
136	4	2e-26	4.99e-27	0.982384	0.422984
136	69	3.51e-25	5.08e-27	NA	NA
137	4	270.692	67.6731	0.89687	0.470702
137	69	5206.38	75.4548	NA	NA
138	4	1.46235	0.365587	0.00387155	0.999969
138	69	6515.6	94.429	NA	NA
139	4	2e-26	4.99e-27	0.982384	0.422984
139	69	3.51e-25	5.08e-27	NA	NA
140	4	2e-26	4.99e-27	0.982384	0.422984
140	69	3.51e-25	5.08e-27	NA	NA
141	4	263.816	65.9541	0.492563	0.741179
141	69	9239.09	133.9	NA	NA
142	4	304.87	76.2174	0.89603	0.47119
142	69	5869.23	85.0612	NA	NA
143	4	18.5804	4.64509	0.040204	0.996856
143	69	7972.11	115.538	NA	NA
144	4	1.24837	0.312091	0.00336336	0.999977
144	69	6402.61	92.7914	NA	NA
145	4	2e-26	4.99e-27	0.982384	0.422984
145	69	3.51e-25	5.08e-27	NA	NA
146	4	2e-26	4.99e-27	0.982384	0.422984
146	69	3.51e-25	5.08e-27	NA	NA
147	4	200.734	50.1836	0.849249	0.498928
147	69	4077.33	59.0917	NA	NA
148	4	2e-26	4.99e-27	0.982384	0.422984
148	69	3.51e-25	5.08e-27	NA	NA
149	4	700.383	175.096	1.90528	0.11935
149	69	6341.1	91.9	NA	NA
150	4	34.5607	8.64017	0.10673	0.979798
150	69	5585.78	80.9533	NA	NA
151	4	35.0482	8.76204	0.108727	0.979093
151	69	5560.56	80.5878	NA	NA
152	4	336.13	84.0324	1.52306	0.205085
152	69	3806.98	55.1736	NA	NA
153	4	2e-26	4.99e-27	0.982384	0.422984
153	69	3.51e-25	5.08e-27	NA	NA
154	4	2e-26	4.99e-27	0.982384	0.422984
154	69	3.51e-25	5.08e-27	NA	NA
155	4	7.26621	1.81655	0.0099813	0.999798
155	69	12557.7	181.996	NA	NA
156	4	82.3467	20.5867	0.103427	0.980942
156	69	13734.1	199.045	NA	NA
157	4	2e-26	4.99e-27	0.982384	0.422984
157	69	3.51e-25	5.08e-27	NA	NA
158	4	405.135	101.284	0.869743	0.486637
158	69	8035.23	116.453	NA	NA
159	4	2e-26	4.99e-27	0.982384	0.422984
159	69	3.51e-25	5.08e-27	NA	NA
160	4	2e-26	4.99e-27	0.982384	0.422984
160	69	3.51e-25	5.08e-27	NA	NA
161	4	617.973	154.493	1.24695	0.29934
161	69	8548.9	123.897	NA	NA
162	4	2e-26	4.99e-27	0.982384	0.422984
162	69	3.51e-25	5.08e-27	NA	NA
163	4	2e-26	4.99e-27	0.982384	0.422984
163	69	3.51e-25	5.08e-27	NA	NA
164	4	67.5602	16.8901	0.0929106	0.984396
164	69	12543.4	181.788	NA	NA
165	4	2e-26	4.99e-27	0.982384	0.422984
165	69	3.51e-25	5.08e-27	NA	NA
166	4	40.6336	10.1584	0.113055	0.977529
166	69	6199.92	89.8539	NA	NA
167	4	173.904	43.4761	1.10769	0.359994
167	69	2708.22	39.2495	NA	NA
168	4	716.666	179.166	4.38807	0.00321425	*
168	69	2817.3	40.8304	NA	NA
169	4	2e-26	4.99e-27	0.982384	0.422984
169	69	3.51e-25	5.08e-27	NA	NA
170	4	2e-26	4.99e-27	0.982384	0.422984
170	69	3.51e-25	5.08e-27	NA	NA
171	4	2e-26	4.99e-27	0.982384	0.422984
171	69	3.51e-25	5.08e-27	NA	NA
172	4	2e-26	4.99e-27	0.982384	0.422984
172	69	3.51e-25	5.08e-27	NA	NA
173	4	2e-26	4.99e-27	0.982384	0.422984
173	69	3.51e-25	5.08e-27	NA	NA
Needle Tissue
133	4	918.693	229.673	2.33373	0.0648471
133	65	6396.95	98.4145	NA	NA
134	4	589.186	147.297	0.945966	0.443242
134	65	10121.2	155.71	NA	NA
135	4	173.754	43.4385	0.582849	0.676143
135	65	4844.31	74.5278	NA	NA
136	4	603.3	150.825	1.86004	0.128127
136	65	5270.64	81.0867	NA	NA
137	4	6.32186	1.58047	0.00939616	0.99982
137	65	10933.2	168.203	NA	NA
138	4	948.575	237.144	1.85266	0.129481
138	65	8320.13	128.002	NA	NA
139	4	292.829	73.2072	2.177	0.0813335
139	65	2185.79	33.6276	NA	NA
140	4	360.995	90.2488	1.78757	0.142019
140	65	3281.64	50.4868	NA	NA
141	4	985.915	246.479	1.60194	0.184435
141	65	10001.1	153.863	NA	NA
142	4	286.347	71.5867	0.404237	0.804923
142	65	11510.9	177.091	NA	NA
143	4	202.17	50.5424	0.250187	0.90854
143	65	13131.2	202.019	NA	NA
144	4	721.985	180.496	1.54701	0.19911
144	65	7583.82	116.674	NA	NA
145	4	246.181	61.5453	0.652037	0.627515
145	65	6135.3	94.3892	NA	NA
146	4	204.072	51.018	0.585248	0.674435
146	65	5666.26	87.1733	NA	NA
147	4	502.052	125.513	1.85569	0.128924
147	65	4396.4	67.6369	NA	NA
148	4	320.53	80.1325	2.43611	0.0559058
148	65	2138.09	32.8937	NA	NA
149	4	146.4	36.6001	0.205192	0.934646
149	65	11594.1	178.37	NA	NA
150	4	988.923	247.231	1.80461	0.138628
150	65	8904.97	136.999	NA	NA
151	4	8.58e-27	2.14e-27	0.91199	0.462359
151	65	1.53e-25	2.35e-27	NA	NA
152	4	156.411	39.1029	0.217118	0.927996
152	65	11706.5	180.1	NA	NA
153	4	637.2	159.3	2.44347	0.0553121
153	65	4237.63	65.1943	NA	NA
154	4	275.897	68.9743	2.65005	0.0409754	*
154	65	1691.79	26.0275	NA	NA
155	4	8.58e-27	2.14e-27	0.91199	0.462359
155	65	1.53e-25	2.35e-27	NA	NA
156	4	454.882	113.721	2.0762	0.0940388
156	65	3560.27	54.7733	NA	NA
157	4	430.962	107.741	0.850512	0.498478
157	65	8234.03	126.677	NA	NA
158	4	390.101	97.5253	0.575374	0.681476
158	65	11017.4	169.499	NA	NA
159	4	244.312	61.0781	1.29831	0.279989
159	65	3057.88	47.0443	NA	NA
160	4	364.733	91.1834	1.82095	0.135451
160	65	3254.85	50.0747	NA	NA
161	4	164.67	41.1674	0.197651	0.93874
161	65	13538.4	208.283	NA	NA
162	4	276.403	69.1009	3.19009	0.0186923
162	65	1407.97	21.6611	NA	NA
163	4	292.689	73.1722	1.24034	0.302642
163	65	3834.58	58.9935	NA	NA
164	4	48.9346	12.2337	0.0947558	0.98379
164	65	8391.97	129.107	NA	NA
165	4	421.754	105.438	1.66459	0.168934
165	65	4117.22	63.3418	NA	NA
166	4	38.7899	9.69746	1.10268	0.362897
166	65	571.64	8.79446	NA	NA
167	4	406.443	101.611	2.13558	0.0863377
167	65	3092.7	47.58	NA	NA
168	4	337.293	84.3233	1.55063	0.198112
168	65	3534.71	54.3802	NA	NA
169	4	35.3271	8.83177	1.10268	0.362897
169	65	520.61	8.00938	NA	NA
170	4	319.153	79.7884	2.78291	0.0337783	*
170	65	1863.61	28.6709	NA	NA
171	4	187.579	46.8947	1.42864	0.234488
171	65	2133.61	32.8248	NA	NA
172	4	916.857	229.214	2.83478	0.0313239	*
172	65	5255.75	80.8577	NA	NA
173	4	317.56	79.3901	1.09822	0.365009
173	65	4698.85	72.2901	NA	NA
a Peak number assigned to peaks identified from GC-MS
b Degrees of freedom
c Sum of Squares
d Mean Squares
e F value
f Probability of F value
g Significance determined if Pr(>F)
