# Supplementary material for: Distinct terpene metabolite blends serve as core drivers of consumer aroma preferences in fir Christmas tree species
Source: Research Square preprint supplement (doi:10.21203/rs.3.rs-5760578/v1), 2025-04-21
Supplement: Supplementary file 11 [file ebcf78bc027c461173ac5bed.docx]

**SUPPORTING INFORMATION**

The following materials are available in the online version of this article

**Figure S1.** PCA of monoterpenes and diterpenes over five time points (hours). a) PCA of monoterpene b) PCA of diterpenes over time.

**Figure S2.** Hierarchical clustering of the diterpene extracts of five fir species by tissue types. a) Hierarchical clustering of needle tissues of the five fir species b) Hierarchical clustering of stem tissue of the five fir species.

**Figure S3.** Hierarchical clustering of the diterpene extracts of five fir species by tissue types. a) Hierarchical clustering of needle tissues of the five fir species b) Hierarchical clustering of stem tissue of the five fir species.

**Table S1.** List of monoterpenes and sesquiterpenes, identified by GC-MS from samples collected in October 2021 from Concolor fir, Fraser fir, Noble fir, Nordmann fir, and Trojan fir for aroma evaluation.

**Table S2.** Repeated measures ANOVA for each monoterpene and sesquiterpene normalized abundance over time. Significance was determined as having a *p*-value ≤ 0.05. Five time points were measured.

**Table S3.** Mono/sesqui-terpene pairwise comparisons for significant compounds from repeated measures ANOVA. Significance was determined as having a *p*-value ≤ 0.05.

**Table S4.** Metabolite profiles of diterpenes identified in the five species with varying consumer liking ratings. Quantities are presented as mean normalized peak areas. Different letters indicate significantly different means separated within row by the protected LSD test (α =0.05). * Indicates a significant interaction between family and tissue type for a peak.

**Table S5.** Two-way ANOVA for each monoterpene and sesquiterpene peak between species and tissue type. Significant α = <0.05.

**Table S6.** List of diterpenes identified by GC-MS from samples collected in October 2021 from Concolor fir, Fraser fir, Noble fir, Nordmann fir, and Trojan fir for aroma evaluation.

**Table S7.** Repeated measures ANOVA for each diterpene compound normalized abundance level over time. Significance was determined as having a *p*-value ≤ 0.05. Five time points were measured.

**Table S8.** Diterpene pairwise comparisons for significant compounds from repeated measures ANOVA. Significance was determined as having a *p*-value ≤ 0.05.

**Table S9.** Two-way ANOVA for each diterpene peak between species and tissue type. Significant α = <0.05.

**Table S10.** Metabolite profiles of monoterpenes and sesquiterpenes identified in the five species with varying consumer liking. Quantities are presented as mean normalized peak areas. Different letters indicate significantly different means separated within row by the protected LSD test (α =0.05). * Indicates a significant interaction between family and tissue type for a peak.
